# Supplementary material for: The large-scale organization of shape processing in the ventral and dorsal pathways
Source: eLife journal article supplement (doi:10.7554/elife.27576), 2017-10-05
Supplement: supp [file elife-27576-supp-v1.zip]

Archive with 26 entries (26 files):
- elife_poa_e27576_Figure_3_figure_supplement_1.tif
- elife_poa_e27576_Transparent_Reporting_File.pdf
- elife_poa_e27576_Source_code_file_1.docx
- elife_poa_e27576_Figure_3_source_data_1.xlsx
- elife_poa_e27576_Figure_2_source_data_2.xlsx
- elife_poa_e27576_Figure_6_source_data_1.xlsx
- elife_poa_e27576_Figure_5_source_data_1.xlsx
- elife_poa_e27576_Figure_2_source_data_6.xlsx
- elife_poa_e27576_Figure_4_source_data_2.xlsx
- elife_poa_e27576_Figure_2_Supplement_2.tif
- elife_poa_e27576_Figure_4_source_data_1.xlsx
- elife_poa_e27576_Figure_3_source_data_5.xlsx
- elife_poa_e27576_Figure_6_source_data_2.xlsx
- elife_poa_e27576_Figure_3_source_data_3.xlsx
- elife_poa_e27576_Figure_2_source_data_1.xlsx
- elife_poa_e27576_Supplementary_File_1.docx
- elife_poa_e27576_Figure_5_figure_supplement_1.tif
- elife_poa_e27576_Figure_2_source_data_3.xlsx
- elife_poa_e27576_Figure_5_source_data_2.xlsx
- elife_poa_e27576_Figure_3_figure_supplement_2.tif
- elife_poa_e27576_Figure_3_source_data_2.xlsx
- elife_poa_e27576_Figure_3_source_data_6.xlsx
- elife_poa_e27576_Figure_3_source_data_4.xlsx
- elife_poa_e27576_Figure_2_source_data_5.xlsx
- elife_poa_e27576_Figure_2_figure_supplement_1.tif
- elife_poa_e27576_Figure_2_source_data_4.xlsx
