# Supplementary material for: The large-scale organization of shape processing in the ventral and dorsal pathways
Source: eLife journal article supplement (doi:10.7554/elife.27576), 2017-10-05
Supplement: supp [file elife-27576-supp-v1.zip › elife_poa_e27576_Figure_2_source_data_1.xlsx]

## Sheet: Figure2C-data source
	Correlation coefficients between spatial location and shape sensitivity - Experiment 1
	Dorsal left		Dorsal right		Ventral left		Ventral right
	1st	2nd	1st	2nd	1st	2nd	1st	2nd
sub1	1.10258	-0.427371	1.02394	-0.478871	0.61563	-0.519795	0.556167	-0.484
sub2	0.565414	-0.437583	0.768763	-0.39931	0.373902	-0.606625	0.486724	-0.17855
sub3	0.86596	-0.462564	0.871354	-0.533117	0.491034	-0.62864	0.401264	-0.475458
sub4	-0.179098	-0.0338153	0.702015	-0.275647	0.334567	-0.330671	0.365657	-0.252033
sub5	0.478196	-0.544993	1.15393	-0.333384	0.727807	-0.360941	0.586561	-0.382429
sub6	0.695076	-0.585497	0.632082	-0.408904	0.863974	-0.336747	0.381886	-0.217649
sub7	0.128702	-0.595271	0.441953	-0.850149	0.243451	-0.380482	0.655711	-0.0824582
sub8	0.4185	-0.334953	0.470603	-0.263629	0.59735	-0.118768	0.428363	-0.0979522
sub9	0.894863	-0.414534	1.11883	-0.548987	0.87678	-0.514736	0.695426	-0.42635
sub10	0.875144	-0.671098	1.07946	-0.586255	0.610198	-0.364734	0.813047	-0.33375
sub11	0.503492	-0.355427	0.54333	-0.354797	0.290591	-0.457659	0.459543	-0.344626
