# Supplementary material for: The large-scale organization of shape processing in the ventral and dorsal pathways
Source: eLife journal article supplement (doi:10.7554/elife.27576), 2017-10-05
Supplement: supp [file elife-27576-supp-v1.zip › elife_poa_e27576_Figure_2_source_data_2.xlsx]

## Sheet: Figure2d-data source
	Location of maximal shape sensitivity on the y axis - Experiment 1
	Dorsal left	Dorsal right	Ventral left	Ventral right
sub1	-89	-80	-73	-66
sub2	-87	-76	-46	-73
sub3	-89	-80	-61	-58
sub4	-78	-94	-69	-69
sub5	-82	-85	-74	-63
sub6	-92	-85	-85	-78
sub7	-87	-79	-68	-80
sub8	-85	-84	-74	-78
sub9	-88	-83	-68	-64
sub10	-94	-80	-71	-63
sub11	-90	-84	-60	-59
