# Supplementary material for: The large-scale organization of shape processing in the ventral and dorsal pathways
Source: eLife journal article supplement (doi:10.7554/elife.27576), 2017-10-05
Supplement: supp [file elife-27576-supp-v1.zip › elife_poa_e27576_Figure_2_source_data_3.xlsx]

## Sheet: Figure2C-data source
	Avg shape sensitivity - Experiment 1
	Dorsal left	Dorsal right	Ventral left	Ventral right
sub1	0.113418	0.123254	0.141418	0.127349
sub2	0.0895942	0.0657288	0.120694	0.0882273
sub3	0.094485	0.0949736	0.130562	0.1231
sub4	0.0931072	0.0780205	0.115707	0.0973148
sub5	0.0655513	0.066134	0.0932189	0.0915229
sub6	0.0596289	0.0494575	0.0880065	0.057381
sub7	0.0697779	0.0802236	0.103327	0.0849363
sub8	0.0741867	0.0645016	0.0868182	0.0820541
sub9	0.0669349	0.0790246	0.0881667	0.100138
sub10	0.0952516	0.0889382	0.111562	0.0911885
sub11	0.105441	0.0993605	0.110656	0.0913227
