# Supplementary material for: The large-scale organization of shape processing in the ventral and dorsal pathways
Source: eLife journal article supplement (doi:10.7554/elife.27576), 2017-10-05
Supplement: supp [file elife-27576-supp-v1.zip › elife_poa_e27576_Figure_2_source_data_4.xlsx]

## Sheet: Figure2_supAdata source
	Correlation coefficients between spatial location and shape sensitivity - Experiment 1 (Only objects)
	Dorsal left		Dorsal right		Ventral left		Ventral right
	1st	2nd	1st	2nd	1st	2nd	1st	2nd
sub1	0.996094	-0.689295	1.07087	-0.697226	0.740384	-0.403865	0.683844	-0.377179
sub2	0.609812	-0.717557	0.786051	-0.579324	0.44376	-0.568155	0.525848	-0.205968
sub3	0.804957	-0.616897	0.756613	-0.577377	0.553729	-0.574921	0.439415	-0.408849
sub4	-0.352782	-0.101669	0.497038	-0.489259	0.346811	-0.35562	0.432363	-0.159753
sub5	0.718698	-0.579121	0.424861	-0.417405	0.88911	-0.205484	0.66995	-0.169739
sub6	0.549806	-0.581867	0.749417	-0.368851	0.937573	-0.304066	0.484632	-0.167581
sub7	-0.409815	-0.0736093	0.34778	-0.822004	0.135358	-0.37596	0.419738	-0.12723
sub8	0.348339	-0.366355	0.179546	-0.29818	0.568487	-0.0452712	0.419165	-0.100017
sub9	0.822928	-0.510592	1.0611	-0.568628	1.04376	-0.448087	0.777161	-0.360036
sub10	1.10216	-0.719799	1.03921	-0.54764	0.649304	-0.287073	0.753392	-0.251048
sub11	0.257598	-0.358365	0.689651	-0.391744	0.339504	-0.42883	0.565379	-0.272291
