# Supplementary material for: The large-scale organization of shape processing in the ventral and dorsal pathways
Source: eLife journal article supplement (doi:10.7554/elife.27576), 2017-10-05
Supplement: supp [file elife-27576-supp-v1.zip › elife_poa_e27576_Figure_2_source_data_5.xlsx]

## Sheet: Figure2-supBdata source
	Correlation coefficients between spatial location and shape sensitivity - Experiment 1 (Distance - based on y and z axes)
	Dorsal left		Dorsal right		Ventral left		Ventral right
	1st	2nd	1st	2nd	1st	2nd	1st	2nd
sub1	0.896476	-0.286144	0.895569	-0.420514	0.441788	-0.586676	0.448068	-0.448506
sub2	0.567632	-0.394229	0.717083	-0.467244	0.334744	-0.546761	0.342538	-0.0751065
sub3	0.707607	-0.52636	0.674078	-0.50235	0.385761	-0.581776	0.348187	-0.472344
sub4	-0.351992	0.142828	1.55272	-0.180002	0.225188	-0.449377	0.303404	-0.178867
sub5	0.518047	-0.51993	1.33583	-0.477378	0.494206	-0.470644	0.499219	-0.377637
sub6	0.582782	-0.695605	0.602715	-0.374685	0.532591	-0.216619	0.260343	-0.168037
sub7	0.238511	-0.581068	0.548342	-0.853104	0.100829	-0.464591	0.368242	-0.304477
sub8	0.634361	-0.267766	0.568942	-0.340241	0.438955	-0.0464427	0.441113	-0.0238495
sub9	0.680597	-0.527641	0.871168	-0.520895	0.784468	-0.422022	0.587707	-0.375661
sub10	0.951866	-0.566352	1.27803	-0.53811	0.395715	-0.259038	0.72841	-0.302141
sub11	0.735071	-0.300474	0.627252	-0.242376	0.223335	-0.417958	0.377437	-0.379731
