# Supplementary material for: The large-scale organization of shape processing in the ventral and dorsal pathways
Source: eLife journal article supplement (doi:10.7554/elife.27576), 2017-10-05
Supplement: supp [file elife-27576-supp-v1.zip › elife_poa_e27576_Figure_2_source_data_6.xlsx]

## Sheet: Figure2_supC-data source
	Slope (shape sensitivity) per ROI- Experiment 1
	Left Ventral											Left Dorsal											Right Ventral											Right Dorsal
Slope	lh_v1v	lh_v2v	lh_v3v	lh_hv4	lh_vo1	lh_vo2	lh_ph1	lh_ph2	lh_lo1	lh_lo2	lh_to1	lh_v1d	lh_v2d	lh_v3d	lh_v3a	lh_v3b	lh_ips0	lh_ips1	lh_ips2	lh_ips3	lh_ips4	lh_aIPS	rh_v1v	rh_v2v	rh_v3v	rh_hv4	rh_vo1	rh_vo2	rh_ph1	rh_ph2	rh_lo1	rh_lo2	rh_to1	rh_v1d	rh_v2d	rh_v3d	rh_v3a	rh_v3b	rh_ips0	rh_ips1	rh_ips2	rh_ips3	rh_ips4	rh_aIPS
sub1	-0.121285	-0.248465	-0.0830642	-0.0215414	0.122594	0.172781	0.23967	0.211255	0.113986	0.321238	0.295567	-0.0420745	-0.300317	-0.089228	0.0696113	0.133634	0.229746	0.264544	0.140705	0.155217	0.176353	0.0478319	-0.138327	-0.247551	-0.146212	-0.114456	0.103871	0.160624	0.196578	0.241738	0.115539	0.383636	0.289477	-0.0059268	-0.135147	-0.173345	-0.0519732	0.136326	0.155821	0.172965	0.213315	0.184349	0.175092	-0.0462227
sub2	-0.0394149	-0.124469	-0.080473	-0.0028128	0.0436677	0.0855198	0.0594871	0.154326	0.19553	0.321164	0.128225	-0.196403	-0.135674	0.0191457	-0.0090035	0.0643265	0.0737905	0.0873292	0.0784774	0.115761	0.0743937	0.020264	-0.1447	-0.172059	-0.146782	-0.0400434	0.0573963	0.0809	0.0547711	0.0366784	0.0574558	0.178795	0.137031	-0.157118	-0.0812213	-0.0395908	-0.0060895	0.0451211	0.0259353	0.0394214	0.0270532	0.0485504	0.0535936	-0.014876
sub3	-0.206999	-0.0874157	-0.153992	-0.0631162	-0.0526867	0.0595412	0.0593082	0.194951	0.197663	0.408777	0.341414	-0.20656	-0.108161	-0.0572475	0.131314	0.103508	0.2206	0.0903197	0.0469378	0.08732	0.0989417	0.0798328	0.0373465	0.0069065	-0.026584	0.110339	0.0778748	0.104698	0.103433	0.1713	0.197641	0.425165	0.201206	0.0208926	-0.0700109	-0.0917636	0.0541802	0.0858305	0.192744	0.113512	0.105019	0.135437	0.169176	0.00588
sub4	-0.176989	-0.207873	-0.13923	-0.0772707	0.0179959	0.257256	0.243649	0.123689	0.188446	0.385302	0.213754	-0.0453196	0.0457675	0.108314	0.173703	0.25447	0.114718	0.100771	0.135318	0.163129	0.163275	0.124809	-0.329398	-0.278958	-0.118751	-0.0769242	0.0261166	0.151669	0.217775	0.188927	0.263524	0.19175	0.0799292	-0.238232	0.020075	0.0631726	0.1548	0.228164	0.105618	0.0556023	0.13754	0.0949301	0.0969586	0.0472141
sub5	-0.0368938	-0.225195	-0.0781703	-0.0777894	0.0231785	0.101512	0.142336	0.15293	0.0640343	0.187648	0.211758	-0.0034793	-0.266039	-0.0253168	0.14666	0.0669468	0.138959	0.123995	0.04941	0.0551608	0.0359717	0.0556365	-0.134513	-0.159523	-0.119518	-0.056233	0.0676783	0.162779	0.199834	0.193838	0.105386	0.171065	0.172501	-0.292279	-0.142977	-0.0619416	0.0920837	0.106685	0.0408938	0.0258153	0.0340031	0.0759111	0.0769752	0.0344149
sub6	-0.149328	-0.0804141	-0.0103893	-0.031807	-0.0044338	0.0160151	0.0009479	-0.0101788	0.148108	0.177987	0.231458	-0.0543313	-0.223277	0.0042098	0.066787	0.165714	0.070379	0.0304317	0.0364398	0.0395813	0.0577113	-0.0033301	-0.0816337	-0.0726471	-0.109914	0.0156754	0.100327	0.0773692	0.0911295	0.0410035	0.148873	0.209996	0.07851	-0.290511	-0.0220859	0.0501278	0.0376393	0.0588318	0.0050415	0.0579381	0.0843233	0.0873584	0.0611595	-0.0176992
sub7	-0.0121643	-0.158705	-0.0973885	-0.015264	0.022174	0.0323245	-0.0001202	0.0021124	0.216182	0.190161	0.143297	-0.14111	0.0074766	0.114112	0.0999135	0.24534	0.171337	0.162125	0.096617	0.0219784	-0.0018616	0.0493698	-0.206937	-0.107391	-0.101121	0.0063354	-0.0072453	0.0828089	0.0926465	0.0639756	0.0833297	0.118744	0.0970807	-0.201402	0.0489607	0.0148903	0.114505	0.190212	0.222381	0.134547	0.03478	0.0129009	0.0068617	-0.0120391
sub8	-0.117455	-0.132148	-0.116216	-0.0755607	-0.0657392	-0.0155396	0.127931	0.123653	0.100976	0.255213	0.0767784	-0.175902	-0.0603163	0.0180135	0.017067	0.0590343	0.127905	0.071577	0.0091392	0.0638874	0.0755566	0.125599	-0.198398	-0.1976	-0.0997754	-0.0213496	0.0457825	0.0398106	0.0838013	0.167146	0.206315	0.207788	0.191523	-0.295415	0.0021397	0.066627	0.104224	0.0416612	0.0807563	0.0318596	0.0253042	0.0060138	0.0090511	0.0180494
sub9	-0.0953868	-0.0967231	-0.0729667	-0.0257121	0.125196	0.112423	0.0869524	0.0756633	0.0163202	0.0431208	0.154986	-0.0893412	-0.144586	-0.173126	-0.0176588	0.0819738	0.151721	0.145062	0.0255285	0.0893783	0.0353235	0.0379022	-0.160134	-0.0642503	-0.131784	-0.0187476	0.0661184	0.135586	0.169048	0.124314	0.0911071	0.198211	0.12991	-0.304511	-0.109387	-0.050576	0.0379367	0.0864115	0.109579	0.163923	0.0865906	0.0564067	0.0603875	-0.0036143
sub10	-0.0859855	-0.116733	0.0009533	0.0190547	0.138683	0.107454	0.234759	0.256052	0.188542	0.225263	0.119513	-0.174422	-0.265889	0.108481	0.15713	0.167606	0.185892	0.159693	0.0755931	0.135175	0.132643	-0.0004198	-0.0282103	-0.0449729	-0.0726081	-0.0423847	0.0789693	0.12049	0.106835	0.183307	0.0411607	0.1329	0.200393	-0.0546936	-0.226664	-0.191982	0.047167	0.122284	0.14432	0.134536	0.107419	0.124198	0.153628	0.0403128
sub11	-0.136889	-0.046971	-0.0149309	0.0160209	0.067537	0.0696183	0.146423	0.130791	0.204688	0.244657	0.206329	-0.132311	-0.192297	0.0505282	0.205926	0.18098	0.25589	0.244815	0.0758431	0.0700964	0.0796234	0.0637227	-0.0427329	-0.102471	-0.0347461	-0.0092877	0.146783	0.0711337	0.0677466	0.0980795	0.141606	0.161222	0.206534	-0.017784	-0.0662931	-0.0171649	0.156047	0.226435	0.226111	0.157779	0.126829	0.0922709	0.113554	0.0718723
