# Supplementary material for: The large-scale organization of shape processing in the ventral and dorsal pathways
Source: eLife journal article supplement (doi:10.7554/elife.27576), 2017-10-05
Supplement: supp [file elife-27576-supp-v1.zip › elife_poa_e27576_Figure_3_source_data_1.xlsx]

## Sheet: Figure3C-data source
	Correlation coefficients between spatial location and shape sensitivity - Experiment 2
	Dorsal left		Dorsal right		Ventral left		Ventral right
	1st	2nd	1st	2nd	1st	2nd	1st	2nd
sub1	0.81178	-0.178091	0.943939	-0.224612	0.727626	-0.235334	0.430205	0.0978623
sub2	1.06672	-0.410547	0.840681	-0.180473	0.538133	-0.192466	0.448947	-0.0909789
sub3	0.452818	-0.172946	0.734188	-0.222252	0.715964	-0.236992	0.481125	-0.310316
sub4	0.214235	-0.147124	0.249554	-0.375275	0.801273	-0.441925	0.683542	-0.170015
sub5	0.306796	-0.460846	0.242706	-0.00275123	0.678831	-0.399152	0.570883	-0.284556
sub6	0.930577	-0.377307	0.281489	-0.399534	0.550116	-0.269631	0.252406	-0.149347
sub7	0.710994	-0.134386	0.848947	-0.256137	0.658273	-0.587537	0.733579	-0.420432
sub8	0.406872	-0.375042	0.354436	-0.598283	0.727793	-0.358688	0.556783	-0.13067
sub9	0.564109	-0.00957693	0.648488	-0.271646	0.591387	-0.314958	0.519051	-0.165015
sub10	-0.507852	-0.270908	0.854643	-0.421498	0.606515	-0.29018	0.622261	-0.180067
sub11	0.725818	-0.439576	0.868826	-0.306865	0.575145	-0.318465	0.646758	-0.202119
