# Supplementary material for: The large-scale organization of shape processing in the ventral and dorsal pathways
Source: eLife journal article supplement (doi:10.7554/elife.27576), 2017-10-05
Supplement: supp [file elife-27576-supp-v1.zip › elife_poa_e27576_Figure_3_source_data_2.xlsx]

## Sheet: Figure3d-data source
	Location of maximal shape sensitivity on the y axis - Experiment 2
	Dorsal left	Dorsal right	Ventral left	Ventral right
sub1	-88	-80	-66	-63
sub2	-86	-80	-80	-79
sub3	-87	-83	-58	-42
sub4	-45	-65	-56	-51
sub5	-44	-76	-60	-47
sub6	-88	-90	-58	-42
sub7	-83	-81	-57	-57
sub8	-74	-43	-58	-61
sub9	-90	-77	-62	-55
sub10	-84	-88	-73	-65
sub11	-85	-89	-54	-58
