# Supplementary material for: The large-scale organization of shape processing in the ventral and dorsal pathways
Source: eLife journal article supplement (doi:10.7554/elife.27576), 2017-10-05
Supplement: supp [file elife-27576-supp-v1.zip › elife_poa_e27576_Figure_3_source_data_3.xlsx]

## Sheet: Figure3E-data source
	Avg shape sensitivity - Experiment 1
	Dorsal left	Dorsal right	Ventral left	Ventral right
sub1	0.0456636	0.0425517	0.0677612	0.0471989
sub2	0.0492701	0.0458263	0.0629347	0.0644088
sub3	0.0520013	0.0424771	0.0605718	0.0445211
sub4	0.0539125	0.0438197	0.0514094	0.0482226
sub5	0.0291056	0.024863	0.0703	0.039608
sub6	0.0565344	0.0394414	0.0705713	0.0575744
sub7	0.0548116	0.0712996	0.0815843	0.0858157
sub8	0.0547209	0.0314763	0.0695927	0.0531741
sub9	0.0419427	0.0474592	0.0814418	0.069425
sub10	0.0507873	0.0486855	0.085514	0.06288
sub11	0.078918	0.0616579	0.0848503	0.0782355
