# Supplementary material for: The large-scale organization of shape processing in the ventral and dorsal pathways
Source: eLife journal article supplement (doi:10.7554/elife.27576), 2017-10-05
Supplement: supp [file elife-27576-supp-v1.zip › elife_poa_e27576_Figure_3_source_data_4.xlsx]

## Sheet: Figure3_supAdata source
	Correlation coefficients between spatial location and shape sensitivity - Experiment 2 (Only objects)
	Dorsal left		Dorsal right		Ventral left		Ventral right
	1st	2nd	1st	2nd	1st	2nd	1st	2nd
sub1	0.789171	-0.271212	0.888988	-0.379913	0.681494	-0.214352	0.259386	0.0469196
sub2	0.998898	-0.566512	0.641447	-0.340747	0.503337	-0.190682	0.364668	-0.11865
sub3	0.527965	-0.341422	0.744096	-0.379684	0.607074	-0.355937	0.423898	-0.251791
sub4	-0.0662868	0.242435	0.278578	-0.134245	0.580888	-0.495439	0.664072	-0.180988
sub5	0.67896	-0.394372	0.569862	-0.308578	0.596485	-0.440819	0.430856	-0.396371
sub6	0.938165	-0.557741	0.332567	-0.583698	0.386185	-0.162212	0.233702	-0.242433
sub7	0.736466	-0.26029	0.691837	-0.439958	0.545782	-0.502307	0.576198	-0.378819
sub8	0.608634	-0.365045	0.204574	-0.560698	0.727942	-0.370203	0.483764	0.0281812
sub9	0.585798	-0.286106	0.40339	-0.256132	0.40152	-0.254632	0.349463	-0.44776
sub10	-0.547688	-0.186182	0.881695	-0.631948	0.54248	-0.191457	0.439822	-0.116548
sub11	0.628093	-0.523485	0.679195	-0.305568	0.552188	-0.327774	0.579432	-0.167768
