# Supplementary material for: The large-scale organization of shape processing in the ventral and dorsal pathways
Source: eLife journal article supplement (doi:10.7554/elife.27576), 2017-10-05
Supplement: supp [file elife-27576-supp-v1.zip › elife_poa_e27576_Figure_3_source_data_5.xlsx]

## Sheet: Figure3-supBdata source
	Correlation coefficients between spatial location and shape sensitivity - Experiment 2 (Distance - based on y and z axes)
	Dorsal left		Dorsal right		Ventral left		Ventral right
	1st	2nd	1st	2nd	1st	2nd	1st	2nd
sub1	0.856467	-0.217852	1.02897	-0.440274	0.664343	-0.283883	0.499343	-0.0413969
sub2	1.00054	-0.340713	0.632093	-0.212736	0.330035	-0.419555	0.276119	-0.10035
sub3	0.804485	-0.214611	0.736269	-0.240446	0.680147	-0.274831	0.492555	-0.371065
sub4	0.311146	0.144629	0.468791	-0.109564	0.679271	-0.448156	0.629575	-0.148032
sub5	0.34271	-0.704274	0.288003	-0.227576	0.59031	-0.360665	0.603763	-0.309012
sub6	0.369722	-0.517438	0.458244	-0.414768	0.499309	-0.222765	0.239695	-0.144381
sub7	0.684058	-0.0712586	0.833046	-0.152237	0.572644	-0.536676	0.692829	-0.383418
sub8	0.705449	-0.440603	0.469801	-0.045204	0.655697	-0.399108	0.521768	-0.273882
sub9	0.627196	0.0627134	0.708959	-0.2586	0.503158	-0.34717	0.561668	-0.186778
sub10	-0.553547	-0.192542	0.712247	-0.27648	0.414048	-0.199926	0.551121	-0.179425
sub11	0.635994	-0.455475	0.7511	-0.223208	0.565212	-0.336878	0.574943	-0.169219
