# Supplementary material for: The large-scale organization of shape processing in the ventral and dorsal pathways
Source: eLife journal article supplement (doi:10.7554/elife.27576), 2017-10-05
Supplement: supp [file elife-27576-supp-v1.zip › elife_poa_e27576_Figure_3_source_data_6.xlsx]

## Sheet: Figure 3_supC-data source
	Slope (shape sensitivity) per ROI - Experiment 2
	Left Ventral											Left Dorsal											Right Ventral											Right Dorsal
Slope	lh_v1v	lh_v2v	lh_v3v	lh_hv4	lh_vo1	lh_vo2	lh_ph1	lh_ph2	lh_lo1	lh_lo2	lh_to1	lh_v1d	lh_v2d	lh_v3d	lh_v3a	lh_v3b	lh_ips0	lh_ips1	lh_ips2	lh_ips3	lh_ips4	lh_aIPS	rh_v1v	rh_v2v	rh_v3v	rh_hv4	rh_vo1	rh_vo2	rh_ph1	rh_ph2	rh_lo1	rh_lo2	rh_to1	rh_v1d	rh_v2d	rh_v3d	rh_v3a	rh_v3b	rh_ips0	rh_ips1	rh_ips2	rh_ips3	rh_ips4	rh_aIPS
sub1	-0.0364267	-0.0306541	-0.110168	-0.100819	-0.0184514	0.0911504	0.239702	0.202396	0.0133782	0.074175	0.048129	-0.02045	-0.0845636	-0.187044	-0.0466427	0.0388784	0.0440567	0.0527279	0.0194639	0.0534001	0.0468056	0.0541314	-0.0777151	-0.127929	-0.112182	-0.061019	-0.03505	0.0463522	0.131875	0.193247	-0.0122659	0.0129635	0.0237315	-0.0804161	-0.174646	-0.101143	-0.0296525	0.09104	0.0542089	0.0139888	0.0048488	0.0264754	0.0214284	0.0089892
sub2	-0.0554932	-0.201583	-0.0819625	-0.0143365	0.0309626	0.0888838	0.107631	0.0796614	0.0659096	0.155785	0.0271889	-0.0559578	-0.0656649	-0.0650801	0.0112868	0.0384533	0.0968869	0.0578079	0.0334645	0.035058	0.0444336	-0.0065949	-0.174752	-0.160893	-0.0682394	0.0334502	0.088905	0.110141	0.0821227	0.113513	0.0477121	0.057997	0.0428834	-0.185479	-0.101055	-0.0149525	-0.0186508	0.0679406	0.0775066	0.0480305	0.0164206	0.0061648	0.0149972	0.0348525
sub3	-0.0633751	-0.0817231	-0.0782804	-0.0636876	-0.0377048	0.0053154	0.0290479	0.0917459	-0.0022743	0.0287439	0.0374713	-0.0679986	-0.12069	-0.0833374	0.0035806	0.0664354	0.0388611	0.0730108	0.0626187	0.0107407	-0.0169637	0.0409169	-0.0616007	-0.0277501	-0.0649098	-0.0345386	-0.0194873	0.0635191	0.0881129	0.0981737	0.06668	0.0725748	0.0246767	-0.0998411	-0.0159928	-0.0370545	-0.0381057	0.0900609	0.0287825	0.0359517	0.0239881	0.0344668	0.0443847	-0.0180097
sub4	0.0213249	0.0059262	0.0460838	-0.0034379	0.0243158	0.0245253	0.0138859	0.0497523	0.0324967	0.105135	0.0593769	0.0261843	0.0342997	0.0332186	0.0678359	0.0754947	0.109637	0.0741692	0.0577244	0.0835906	0.0351341	0.0761136	-0.100128	-0.0567215	-0.157548	-0.0977089	-0.0770984	0.0551941	0.110042	0.141283	0.106411	0.0651617	0.0430836	-0.0314027	-0.069531	0.0549673	0.0179313	0.0498863	0.0403447	0.0615122	0.0975937	0.0910271	0.099519	0.0052948
sub5	-0.141143	-0.0207722	-0.0634603	-0.0945842	-0.0217475	0.0872535	0.156958	0.0893224	-0.0381375	-0.0249304	-0.0930018	-0.185263	-0.162234	-0.090459	-0.06286	-0.0430483	-0.014202	0.0047136	0.0080865	-0.0409913	-0.0229953	-0.0795647	-0.132907	-0.083811	-0.10386	-0.0877025	-0.0569962	0.0322449	0.0675735	0.107299	-0.0093373	0.0474518	-0.0881121	-0.136285	-0.0384261	-0.0647078	-0.126549	-0.0812576	-0.0267186	-0.0058453	-0.0626578	-0.057706	-0.0625465	-0.0646001
sub6	-0.116979	-0.0943858	-0.090077	-0.0575935	-0.0311338	-0.0303357	-0.014609	0.0186231	0.0212962	0.10478	0.016958	-0.0860919	-0.165618	-0.0706073	-0.0411545	0.0023414	0.080014	0.0363759	-0.0014772	-0.0055818	-0.031364	0.0030233	-0.0448535	-0.144587	-0.0643217	-0.0060558	0.0094235	0.0021528	0.0156792	0.0909227	0.10102	0.0245234	-0.0302317	-0.0986995	-0.0475358	0.0370263	0.0251835	0.086559	-0.0010851	-0.0242922	-3.52e-05	0.0134779	-0.003228	-0.0399506
sub7	-0.0672979	-0.0494269	-0.0677903	-0.0516693	-0.003924	0.0667241	0.105995	0.0798421	-0.002078	0.060087	0.0696761	-0.0939169	-0.212193	-0.0560871	-0.0525362	0.0080209	0.0787954	0.0574582	0.0526262	0.0716963	0.0444788	0.060551	-0.0779938	-0.0940972	-0.0363467	-0.071831	0.0381362	0.122921	0.131289	0.127531	0.0538407	0.176511	0.0752189	-0.0877439	-0.21904	-0.0983537	-0.0294946	0.0963851	0.133795	0.133229	0.120515	0.0957823	0.0687536	0.0593696
sub8	-0.0495883	-0.151717	-0.140196	-0.113687	-0.0795645	-0.0070805	0.0359944	0.101267	-0.0019908	0.0004295	-0.0025645	-0.0606555	-0.108488	-0.0672479	0.0034427	0.0345296	0.0953073	0.11236	0.0634585	0.0362982	0.0324083	-0.0117413	-0.160344	-0.140101	-0.139751	-0.11398	-0.03288	-0.0223713	-0.0040867	0.0947482	-0.037042	-0.0469589	-0.0215834	-0.12118	-0.0803914	-0.0106932	0.0202181	0.0353039	0.0680995	0.046325	0.0316471	0.0035824	-0.0034455	0.0159618
sub9	-0.06043	-0.0678463	-0.0803598	-0.0058533	0.0434503	0.0963967	0.19862	0.194348	0.0586312	0.0105315	-0.0643312	-0.05147	-0.201998	-0.0453454	-0.113868	0.0337148	0.0146947	0.064576	-0.0197793	0.0226431	-0.0063659	0.0731184	-0.0582486	-0.114945	-0.0643517	0.0608991	0.0561901	0.117477	0.159855	0.156734	0.0438465	0.0192393	0.0702537	-0.182887	-0.0498703	-0.0198167	0.0918819	0.0785729	0.0981226	0.051105	0.0463613	0.0443009	0.0533538	0.0226946
sub10	-0.0807557	-0.113952	-0.0498021	0.0257074	0.13337	0.132808	0.108312	0.0386404	0.123208	0.0933919	-0.0005506	-0.046364	-0.0441161	0.117564	0.0345573	0.139316	0.12106	0.0624016	0.0530883	0.0196857	-0.0093939	-0.0184241	-0.0559133	-0.167334	-0.0129388	0.0422364	0.0776555	0.171468	0.175287	0.112191	0.127151	0.0407608	-0.0418895	-0.191625	-0.108034	0.0733781	0.0713733	0.115187	0.0757418	0.0596789	0.0569955	0.0565782	0.053732	-0.0508926
sub11	-0.0236057	-0.0218608	0.0265074	0.053649	0.0269053	0.107358	0.101778	0.112516	0.0997912	0.141141	0.0754162	-0.0338466	-0.0202794	0.0455871	0.0488364	0.111941	0.160678	0.171292	0.0834028	0.0703129	0.0677159	0.0260231	-0.026362	-0.0836143	-0.0916127	0.026741	0.0846543	0.0579075	0.0480045	0.0798592	0.0569041	0.0097121	0.0590045	-0.0360215	0.0031458	0.0924078	0.134902	0.143005	0.0934739	0.0804936	0.082603	0.064937	0.0602325	0.0621987
