# Supplementary material for: The large-scale organization of shape processing in the ventral and dorsal pathways
Source: eLife journal article supplement (doi:10.7554/elife.27576), 2017-10-05
Supplement: supp [file elife-27576-supp-v1.zip › elife_poa_e27576_Figure_4_source_data_2.xlsx]

## Sheet: Figure2C-data source
	Second-level RSA- Experiment 1
	dorsal-ventral	dorsal-dorsal	ventral-ventral
sub1	0.445094	0.300892	0.35694
sub2	0.441953	0.489322	0.393842
sub3	0.513878	0.402503	0.37702
sub4	0.382069	0.334428	0.371208
sub5	0.575777	0.385875	0.427829
sub6	0.368101	0.392799	0.29253
sub7	0.379115	0.169162	0.232366
sub8	0.563788	0.402482	0.346138
sub9	0.712715	0.574419	0.673179
sub10	0.712715	0.574419	0.673179
sub11	0.502681	0.343857	0.406981
