# Supplementary material for: The large-scale organization of shape processing in the ventral and dorsal pathways
Source: eLife journal article supplement (doi:10.7554/elife.27576), 2017-10-05
Supplement: supp [file elife-27576-supp-v1.zip › elife_poa_e27576_Figure_5_source_data_1.xlsx]

## Sheet: Figure 5B-data source
	RSA Experiment 2
	Left Ventral											Left Dorsal											Right Ventral											Right Dorsal
Slope	lh_v1v	lh_v2v	lh_v3v	lh_hv4	lh_vo1	lh_vo2	lh_ph1	lh_ph2	lh_lo1	lh_lo2	lh_to1	lh_v1d	lh_v2d	lh_v3d	lh_v3a	lh_v3b	lh_ips0	lh_ips1	lh_ips2	lh_ips3	lh_ips4	lh_aIPS	rh_v1v	rh_v2v	rh_v3v	rh_hv4	rh_vo1	rh_vo2	rh_ph1	rh_ph2	rh_lo1	rh_lo2	rh_to1	rh_v1d	rh_v2d	rh_v3d	rh_v3a	rh_v3b	rh_ips0	rh_ips1	rh_ips2	rh_ips3	rh_ips4	rh_aIPS
sub1	0.182986	0.051705	0.165977	0.190406	0.050027	0.116932	0.282904	0.0838431	0.404345	0.219568	0.188126	0.0417781	0.11737	0.252568	0.0557305	0.270218	0.0789864	-0.00124955	-0.0185593	-0.0262592	-0.01113	0.0620803	-0.0214558	0.183941	0.387676	0.13762	0.0453721	0.000406724	0.0119651	0.0287135	0.0703323	0.205795	0.0723304	0.0471862	0.254785	0.245737	0.129525	0.165634	0.132624	0.0478906	-0.0166602	0.0349628	0.0465351	-0.0621978
sub2	0.135509	0.121524	0.0150248	0.0890377	0.0386372	0.11203	-0.0210398	0.0167391	0.121586	0.0415152	0.161391	-0.0533334	-0.0504059	0.0463217	-0.00749888	0.0459845	0.0192931	-0.0278675	-0.0446175	-0.021094	-0.0564898	-0.0310378	0.0513354	0.0367992	0.0541778	-0.0137405	0.0041925	0.00330173	-0.0221023	0.0465846	-0.0177768	0.0545582	0.0541329	0.056779	0.037465	-0.0287135	-0.0443468	-0.0264231	0.0328689	-0.00771229	-0.049891	-0.0718339	-0.0498724	-0.0846218
sub3	-0.00962992	0.0571408	0.119659	0.0404822	0.0315435	0.101992	0.015273	0.109959	0.131252	0.0637737	-0.019996	-0.00125574	0.140151	0.0200192	0.0716298	0.271262	0.0618298	0.0694601	-0.0137915	-0.0105841	-0.0259113	-0.0197207	0.0208496	-0.0156566	0.02522	0.0229853	0.000190217	0.20777	-0.0139779	-0.00808963	0.0115692	0.0094544	0.0070473	0.0462366	-0.0114888	-0.0168721	0.031078	0.0417781	0.00557196	-0.0120594	-0.000573744	-0.000423735	0.0517622	0.0224069
sub4	-0.0326678	0.0736495	0.0762213	0.0388012	-0.0873977	-0.0756073	-0.0141858	0.144192	0.0577857	0.130031	0.0183397	-0.0473454	-0.0685948	-0.0303651	-0.0491749	0.00627097	0.095741	0.0617834	-0.0615035	-0.0794086	-0.0484218	-0.0797844	-0.00236766	0.043821	0.175728	0.0906701	0.0613287	0.00936393	0.0703524	0.0468181	-0.031126	-0.0683172	-0.058876	-0.0225585	0.0678966	-0.071752	-0.108093	-0.0811839	-0.0422985	-0.0500866	-0.0311476	-0.0650387	-0.0626989	-0.0627839
sub5	0.121048	-0.0383202	0.0680884	0.0839583	0.0278351	0.197917	0.172773	0.224531	0.0820283	0.247536	0.362856	0.130432	0.0942038	0.0673074	0.0466348	0.16252	0.0333096	0.0146034	0.0329385	0.00992221	0.00898195	-0.0149235	0.0777724	-0.0248102	-0.0236611	0.0548134	0.0577115	0.108914	0.179132	0.177593	0.228022	0.244702	0.207412	0.00289192	0.00922165	0.0182438	0.120956	0.169349	0.0433339	-0.00246199	0.0211512	0.0518503	0.0290027	0.0240276
sub6	0.0275814	0.042754	0.0232931	0.0314028	0.028814	0.0106769	0.0048312	-0.0205202	0.187671	0.108311	0.107731	0.058426	0.28685	0.143222	0.0342228	0.140177	0.104389	0.0979416	-0.0273402	0.00241869	0.0116589	0.0302074	0.199763	0.223411	0.0405796	0.113844	0.036374	-0.00132843	0.0366129	0.0513106	0.0431328	0.0720504	0.0174582	0.0386527	-0.0061055	0.143806	0.0486553	0.0702766	0.0782889	0.0485919	-0.0535793	0.00744784	0.00230271	0.0185005
sub7	0.0972101	0.0543263	0.0399904	0.0808437	0.0710684	0.0793699	0.271798	0.250896	0.124935	0.082749	0.0870235	0.201802	0.225192	0.108362	0.0617246	0.103354	0.0482161	0.0458918	0.0161715	0.0799097	0.0451711	0.00730093	0.180536	0.174395	0.075646	0.0935372	0.173263	0.0889712	0.0871998	0.293546	0.409034	0.281977	0.150199	0.207629	0.213267	0.124298	0.108597	0.213561	0.0842893	0.0382908	0.0344478	0.0703942	0.0550755	-0.00761641
sub8	-0.00699627	0.036582	0.0241073	0.0599446	0.00171736	-0.0117192	0.0262592	0.091683	0.0694122	0.0625628	0.108077	-0.00655707	-0.00402703	0.0441968	0.0492043	0.0482919	0.0950837	0.0202496	0.0549062	0.044452	0.0566073	0.0103645	0.00242179	-0.00480491	0.012385	0.0279975	0.0199913	-0.00108331	-0.00350432	0.0480955	0.0422467	0.0948981	0.102518	0.0274485	0.0120966	0.0105408	0.0311445	0.0534355	0.00379661	-0.00803241	-0.0470145	-0.0107032	0.0230271	-0.0157416
sub9	0.117019	0.149358	0.244866	0.150862	0.141121	0.116925	0.213003	0.0670027	0.00590446	0.0386542	0.0457758	0.0760775	0.22473	0.000771693	0.31818	0.0728631	0.170946	-0.0021063	0.037932	0.10232	0.0170236	0.0527612	0.114804	0.216369	0.258369	0.0386651	0.00143668	0.110334	0.0401605	0.0566475	0.0372825	0.0513276	0.0456691	0.16284	0.110595	0.108121	0.13448	0.0040425	0.0436617	0.0854306	0.138842	0.138654	0.0749068	0.0270881
sub10	0.131629	0.0251813	0.131632	0.224473	0.0135734	0.168543	0.20716	0.0529329	0.0897623	0.0808298	0.0529251	0.0947682	-0.0228307	0.0777755	0.0748264	0.114787	-0.01632	-0.0609653	-0.0670167	-0.0740671	-0.0109862	0.0169046	0.0066081	0.115397	0.142859	0.0600761	0.0582234	0.165622	0.109361	0.103909	0.0609916	0.0473114	0.0550655	0.0912855	0.155579	0.359906	-0.0263412	0.021626	-0.02642	-0.0231461	-0.10176	-0.0497719	-0.00969797	-0.0352876
sub11	0.004808	0.00560367	0.0322681	0.00390486	0.0140235	0.00259808	-0.0273309	0.0742279	-0.0129131	0.0590987	0.109086	0.0139755	0.0648346	0.03219	-0.0142106	-0.0562702	0.0302197	0.0206238	0.0322039	-0.0373985	-0.0171087	0.0282928	-0.0209471	-0.0235513	0.010963	0.0714636	-0.0229528	-0.0343442	0.0536149	0.0849574	0.0543208	0.0364551	0.0724231	0.0359355	-0.0178162	0.0137026	0.0108733	0.0977143	0.0989082	0.141461	0.0264278	-0.0400074	-0.0253684	0.0303496
