# Supplementary material for: The large-scale organization of shape processing in the ventral and dorsal pathways
Source: eLife journal article supplement (doi:10.7554/elife.27576), 2017-10-05
Supplement: supp [file elife-27576-supp-v1.zip › elife_poa_e27576_Figure_5_source_data_2.xlsx]

## Sheet: Figure5D-data source
	Second-level RSA- Experiment 1
	dorsal-ventral	dorsal-dorsal	ventral-ventral
sub1	0.559772	0.426681	0.414105
sub2	0.433234	0.322339	0.3878
sub3	0.577406	0.408534	0.438472
sub4	0.347787	0.278021	0.245776
sub5	0.488373	0.314065	0.34455
sub6	0.479832	0.295837	0.404759
sub7	0.485032	0.393585	0.356556
sub8	0.585941	0.392033	0.522932
sub9	0.638343	0.477474	0.573439
sub10	0.559772	0.426681	0.414105
sub11	0.644659	0.447469	0.42092
