# Supplementary material for: The large-scale organization of shape processing in the ventral and dorsal pathways
Source: eLife journal article supplement (doi:10.7554/elife.27576), 2017-10-05
Supplement: supp [file elife-27576-supp-v1.zip › elife_poa_e27576_Figure_6_source_data_1.xlsx]

## Sheet: Figure 6A- data source
	Accuracy in the object recognition task- Experiment 1 and 2
	Odd runs										Even runs
	Objectts					Tools					Objects					Tools
	S4	S3	S2	S1	Full	S4	S3	S2	S1	Full	S4	S3	S2	S1	Full	S4	S3	S2	S1	Full	Experiment
sub1	0.133333	0.408333	0.758333	0.908333	1	0.025	0.391667	0.816667	0.866667	0.908333	0.139286	0.457143	0.914286	0.975	1	0.0535714	0.525	0.882143	0.925	1	1
sub2	0	0.233333	0.6	0.766667	0.95	0	0.208333	0.716667	0.825	1	0.0714286	0.292857	0.664286	0.946429	0.982143	0	0.292857	0.646429	0.810714	0.921429	1
sub3	0.0833333	0.325	0.725	0.95	0.958333	0.0416667	0.266667	0.833333	0.891667	0.958333	0.0714286	0.296429	0.85	0.964286	1	0	0.3	0.75	0.835714	0.939286	1
sub4	0.0666667	0.316667	0.516667	0.75	1	0	0.25	0.608333	0.733333	0.908333	0.0785714	0.207143	0.689286	0.896429	0.982143	0	0.285714	0.689286	0.828571	0.95	1
sub5	0	0.183333	0.466667	0.75	0.933333	0	0.0416667	0.408333	0.6	0.841667	0.0535714	0.189286	0.592857	0.825	0.939286	0	0.203571	0.482143	0.707143	0.878571	1
sub6	0	0.316667	0.591667	0.8	0.933333	0	0.108333	0.341667	0.733333	0.858333	0.0357143	0.242857	0.6	0.946429	0.982143	0	0.0607143	0.457143	0.525	0.957143	1
sub7	0.0666667	0.341667	0.666667	0.875	1	0.025	0.333333	0.883333	0.866667	1	0.0357143	0.225	0.707143	0.928571	1	0.0357143	0.335714	0.792857	0.889286	0.957143	1
sub8	0.0416667	0.291667	0.608333	0.9	0.975	0	0.225	0.633333	0.858333	1	0.0357143	0.128571	0.617857	0.871429	1	0.0178571	0.282143	0.628571	0.846429	0.957143	1
sub9	0.333333	0.608333	0.808333	0.95	1	0.183333	0.475	0.883333	0.891667	0.975	0.225	0.675	0.946429	1	0.975	0.0857143	0.625	0.932143	0.939286	1	1
sub10	0.025	0.225	0.691667	0.791667	1	0	0.241667	0.766667	0.858333	0.975	0.0357143	0.2	0.807143	0.957143	0.975	0	0.217857	0.596429	0.792857	0.975	1
sub11	0	0.158333	0.566667	0.791667	1	0	0.2	0.608333	0.825	0.975	0.0178571	0.0964286	0.664286	0.910714	0.964286	0	0.128571	0.653571	0.846429	0.975	1
sub1	0	0	0.13	0.81	0.94	0	0.19	0.31	0.75	1	0	0.06	0.44	0.75	1	0	0	0.69	0.88	0.94	2
sub2	0	0	0.31	0.88	0.94	0	0	0.19	0.81	0.94	0	0	0.06	0.81	0.94	0.06	0	0.19	0.81	0.94	2
sub3	0	0	0.19	0.88	1	0	0	0.06	0.81	0.94	0	0.06	0.06	0.88	0.88	0	0.06	0.31	0.81	0.94	2
sub4	0	0	0.13	0.75	1	0	0	0.13	0.81	0.94	0	0	0.19	0.94	1	0	0	0.13	0.88	1	2
sub5	0	0	0.13	0.88	1	0	0	0.13	1	0.94	0	0	0.25	0.88	1	0	0	0.25	0.88	0.88	2
sub6	0	0	0.13	0.81	0.94	0	0	0.13	0.69	1	0	0	0.31	0.75	1	0	0	0.25	0.94	1	2
sub7	0	0	0.31	0.75	0.94	0	0	0.38	0.88	1	0	0	0.19	1	1	0	0.13	0.31	0.75	1	2
sub8	0	0.06	0.13	0.94	1	0	0.06	0.13	0.88	0.88	0	0	0.06	0.88	1	0	0	0.19	0.88	0.94	2
sub9																					2
sub10	0	0	0.25	0.94	0.94	0	0	0.25	0.69	0.94	0	0	0.25	0.75	0.94	0	0	0.13	0.81	0.94	2
sub11	0	0.06	0.25	0.94	1	0	0.06	0.5	0.75	0.94	0	0	0.5	0.88	1	0	0	0.31	0.88	1	2
