# Supplementary material for: The large-scale organization of shape processing in the ventral and dorsal pathways
Source: eLife journal article supplement (doi:10.7554/elife.27576), 2017-10-05
Supplement: supp [file elife-27576-supp-v1.zip › elife_poa_e27576_Figure_6_source_data_2.xlsx]

## Sheet: Figure7B-datasource
		Partial correlation between behavior and fMRI activation per ROI- Experiment 1 and 2
		Left Ventral											Left Dorsal											Right Ventral											Right Dorsal
Experiment	Correlation (Fisher transformed)	lh_v1v	lh_v2v	lh_v3v	lh_hv4	lh_vo1	lh_vo2	lh_ph1	lh_ph2	lh_lo1	lh_lo2	lh_to1	lh_v1d	lh_v2d	lh_v3d	lh_v3a	lh_v3b	lh_ips0	lh_ips1	lh_ips2	lh_ips3	lh_ips4	lh_aIPS	rh_v1v	rh_v2v	rh_v3v	rh_hv4	rh_vo1	rh_vo2	rh_ph1	rh_ph2	rh_lo1	rh_lo2	rh_to1	rh_v1d	rh_v2d	rh_v3d	rh_v3a	rh_v3b	rh_ips0	rh_ips1	rh_ips2	rh_ips3	rh_ips4	rh_aIPS
1	sub1	-0.219905	-0.553721	-0.459475	-0.308673	0.185255	0.278785	0.376797	0.447044	-0.0351637	0.592135	0.84219	-0.0575886	-0.457206	-0.3783	0.135374	0.0642067	0.524224	0.600616	0.617046	0.50712	0.70491	0.109487	-0.280139	-0.524586	-0.503844	-0.404594	0.0669005	0.182042	0.33366	0.479015	0.161679	0.789866	0.70099	-0.00661127	-0.0991153	-0.34632	-0.282888	0.247712	0.337383	0.421232	0.680925	0.720607	0.707458	-0.0375327
1	sub2	-0.208849	-0.17128	-0.111793	-0.0875035	0.2702	0.265184	0.202699	0.451267	0.56553	0.649861	0.178829	-0.308411	-0.159605	0.276701	-0.206519	0.0623479	0.152166	0.222145	0.278331	0.314412	0.297389	-0.239881	-0.33648	-0.407067	-0.46704	-0.0875134	0.186646	0.342674	0.364266	0.048777	0.299463	0.592701	0.478905	-0.126849	0.261207	-0.0546598	-0.247653	-0.0127401	0.0230673	0.0727833	0.117152	0.222662	0.258524	-0.126647
1	sub3	-0.309175	-0.175862	-0.391083	-0.1857	-0.247797	0.085473	0.0996483	0.525336	0.655113	0.883932	0.817947	-0.255671	0.0125988	-0.283548	0.536999	0.199949	0.711756	0.450089	0.333547	0.339789	0.353526	0.56011	0.331837	0.125814	-0.0846941	0.276113	0.213682	0.167289	0.0845914	0.313494	0.509287	0.768028	0.606931	0.0949138	-0.143767	-0.370897	0.0407633	0.119327	0.357591	0.431258	0.398226	0.418593	0.435706	0.239544
1	sub4	-0.567832	-0.456378	-0.521668	-0.323856	-0.316174	0.56399	0.414454	0.38865	0.665251	0.726275	0.52185	-0.31338	-0.0847148	0.384153	0.590541	0.736203	0.399138	0.273448	0.381993	0.385425	0.412359	0.401546	-0.707833	-0.63569	-0.58536	-0.482966	-0.194865	0.406709	0.448594	0.573878	0.662894	0.384963	0.429915	-0.680294	-0.381725	-0.255499	0.562856	0.562388	0.307164	0.0866878	0.320512	0.0794687	0.15132	-0.0647333
1	sub5	-0.190396	-0.698371	-0.582776	-0.624862	-0.218662	0.14924	0.316539	0.371734	0.0145358	0.392329	0.395835	-0.0400058	-0.751894	-0.0124197	-0.121216	-0.214651	0.21757	0.0684751	-0.293621	-0.0164167	0.0337559	0.189899	-0.543553	-0.680035	-0.442902	-0.444024	-0.101819	0.284505	0.406419	0.331679	0.281549	0.558957	0.522514	-0.768039	-0.640145	-0.540915	-0.154438	0.341349	-0.217641	-0.211414	-0.0698525	0.125956	0.137317	0.0205592
1	sub6	-0.726385	-0.560133	-0.336928	-0.537514	-0.343406	-0.315695	-0.301983	-0.258744	0.166126	0.347757	0.272271	-0.569254	-0.891808	-0.380392	-0.484219	0.0374344	-0.267812	-0.244281	-0.396415	-0.248848	-0.178281	-0.0188576	-0.604771	-0.608986	-0.746052	-0.32859	-0.16194	-0.253759	-0.298432	-0.218691	0.0570479	0.225687	-0.189809	-0.741381	-0.272891	-0.423897	-0.443019	-0.157139	-0.539091	-0.273712	-0.108424	-0.183597	-0.245633	-0.21892
1	sub7	-0.104571	-0.480252	-0.540769	-0.440926	-0.391152	-0.190425	-0.0413567	-0.266271	0.535335	0.565511	0.558812	-0.357054	-0.0446398	0.278579	0.485782	0.586617	0.33733	0.354076	0.177651	0.0773837	0.05371	0.00869951	-0.44729	-0.274089	-0.438722	-0.489073	-0.408066	0.110515	-0.0810213	-0.235709	0.297088	0.640466	0.479938	-0.522697	-0.180639	0.0440776	0.366693	0.440313	0.382738	0.172868	0.0327715	-0.0422981	-0.0685327	-0.235362
1	sub8	-0.330306	-0.503792	-0.530495	-0.412096	-0.523579	-0.385422	0.199498	0.0687694	0.0593704	0.611562	0.176239	-0.534507	-0.362898	-0.24166	0.0525207	-0.0983101	0.334822	0.150033	0.0109463	0.07319	0.139109	0.219819	-0.547692	-0.556503	-0.519878	-0.322242	-0.268802	-0.00727002	0.208507	0.447334	0.48102	0.45805	0.294763	-0.659868	-0.227025	-0.170074	0.342461	-0.0030763	0.22046	0.0487797	-0.0682993	-0.0962654	-0.138787	0.0125156
1	sub9	-0.0495851	0.0204032	-0.0123984	0.0651244	0.21986	0.213158	0.00746582	-0.121646	0.10119	0.225716	0.33417	-0.147924	-0.0564347	-0.125554	-0.0927111	0.195486	0.439042	0.346958	0.128923	0.241651	0.0661496	0.329403	-0.125549	-0.224204	-0.0321688	0.116885	0.154883	0.235886	0.224435	0.153522	0.26971	0.415508	0.441798	-0.188898	-0.0328532	0.0662895	0.376399	0.223882	0.423669	0.484841	0.439598	0.411133	0.356247	0.144071
1	sub10	-0.0918126	-0.166686	-0.0362602	-0.0559929	0.19878	0.151813	0.478814	0.565679	0.574216	0.584361	0.345208	-0.254784	-0.498139	0.190622	0.243784	0.446526	0.545428	0.541744	0.391204	0.563481	0.650776	0.0265709	-0.117745	-0.0653782	-0.0896546	-0.00918169	0.0805536	0.174893	0.213114	0.319463	0.17826	0.623564	0.645262	-0.123961	-0.491645	-0.47775	0.0241344	0.209532	0.423105	0.482418	0.39206	0.423187	0.561508	0.12525
1	sub11	-0.491361	0.0494644	-0.0994996	0.174394	0.337315	0.467312	0.47008	0.38952	0.830239	0.799115	0.567905	-0.523104	-0.426864	0.153476	0.733665	0.781395	0.810678	0.7515	0.224492	0.568078	0.479792	0.362479	-0.171382	-0.281697	0.0277857	0.0680214	0.501917	0.260286	0.29821	0.317025	0.669811	0.634853	0.765563	-0.127627	0.087471	0.0825932	0.475644	0.648063	0.643877	0.554685	0.308732	0.296465	0.338536	0.249282
2	sub1	0.0252409	-0.112025	-0.312681	-0.201336	0.113068	0.540633	0.66206	0.48189	0.118244	0.334124	0.356079	0.0178274	-0.102308	-0.210878	0.128334	0.266671	0.261914	0.22179	0.0131012	0.192646	0.331394	0.200781	-0.150985	-0.308137	-0.370281	-0.137586	0.0523444	0.322267	0.517732	0.495662	-0.0685271	0.152002	0.226217	-0.213982	-0.523763	-0.532061	-0.0837641	0.242159	0.117699	0.0276921	0.00770871	-0.00277737	-0.00731348	0.0430723
2	sub2	-0.565731	-0.623835	-0.381513	-0.242046	-0.0963674	0.176716	0.170717	0.132617	0.107465	0.333549	-0.392115	-0.527933	-0.631359	-0.55889	-0.494044	-0.158703	0.169962	0.112407	-0.0469908	-0.145541	-0.0285397	-0.400184	-0.523285	-0.45793	-0.329496	-0.124186	0.11824	0.118927	0.0320098	0.263774	0.0346122	0.127502	-0.0119545	-0.500408	-0.432745	-0.137048	-0.530208	-0.0284309	0.048334	0.0327945	0.011489	-0.125741	-0.166511	-0.0103364
2	sub3	-0.0034562	0.0823357	0.168184	0.223745	0.340101	0.352008	0.392984	0.55552	0.30296	0.342355	0.324977	-0.099727	-0.116789	0.151977	0.299643	0.526066	0.31554	0.439493	0.291388	0.152095	0.10182	0.119627	0.0287568	0.11253	0.0913109	0.161636	0.373294	0.584163	0.611321	0.544987	0.429361	0.418185	0.266068	0.0071117	-0.232108	-0.016862	0.200956	0.521486	0.220957	0.203431	0.273105	0.27553	0.328894	-0.0479009
2	sub4	0.203061	0.171832	0.211041	0.399702	0.408259	0.332079	0.150706	0.499928	0.236085	0.38889	0.288511	0.0985831	0.0962582	0.280445	0.300315	0.324098	0.493121	0.413202	0.392733	0.380222	0.294986	0.431497	0.0290881	0.168812	-0.0613683	0.0611792	0.366922	0.575292	0.732412	0.705767	0.405118	0.322462	0.172618	0.118754	-0.272515	0.307942	0.325321	0.474219	0.40835	0.454957	0.361035	0.280456	0.290756	-0.0511845
2	sub5	-0.223947	0.019981	-0.167544	-0.139313	0.0436013	0.428235	0.550391	0.387596	-0.0453634	0.0831142	-0.0600078	-0.491027	-0.466498	-0.410823	-0.110888	0.126654	0.194653	0.183112	0.0801588	-0.211391	-0.16196	-0.55213	-0.199748	-0.110566	-0.20288	-0.142569	-0.0243654	0.152903	0.297461	0.383042	0.0933358	0.406894	-0.218432	-0.221737	-0.295058	-0.391659	-0.257634	-0.0879618	0.160269	0.156806	-0.161105	-0.199851	-0.192135	-0.413546
2	sub6	-0.141641	-0.186742	0.0300931	0.0396103	0.181562	0.223396	0.1854	0.265077	0.303457	0.523839	0.30974	-0.033804	-0.378119	-0.0709507	0.0664102	0.263781	0.469433	0.406325	0.241003	0.250227	0.13439	0.368787	-0.130424	-0.237352	-0.166952	0.217527	0.316503	0.163166	0.142647	0.346821	0.491356	0.355742	0.191954	-0.211309	0.00325559	0.378463	0.301578	0.386535	0.225669	0.258389	0.3132	0.334281	0.274209	0.294293
2	sub7	-0.482501	-0.276128	-0.0348909	0.056765	0.00535941	0.21279	0.327418	0.138239	0.0597284	0.446201	0.375876	-0.424657	-0.261947	-0.167458	-0.141078	0.22953	0.394656	0.160495	0.0770831	0.199987	0.163496	0.228173	-0.0361398	-0.211736	-0.149725	-0.022542	0.35079	0.485327	0.565269	0.500889	0.484963	0.633747	0.425259	0.121766	-0.134387	0.0315599	0.0513623	0.576145	0.541634	0.488176	0.430916	0.415893	0.375712	-0.0554493
2	sub8	-0.212958	-0.462132	-0.351265	-0.480906	-0.208801	0.035897	0.266872	0.563849	0.120598	0.0168496	-0.100541	-0.258582	0.0422588	-0.0533904	0.0163116	0.259204	0.268145	0.297181	0.18988	0.118181	-0.113066	0.0994539	-0.102483	-0.174945	-0.358485	-0.272216	0.0180446	0.139825	0.110426	0.397009	-0.139902	-0.309446	-0.259051	-0.0952738	-0.256311	-0.0729559	-0.0408478	0.0432874	0.0515626	-0.0431691	-0.0226332	-0.0706988	-0.0751301	0.129337
2	sub9
2	sub10	-0.215121	-0.297818	0.0468179	0.31377	0.597865	0.232467	0.0995426	-0.201201	0.483301	0.177775	-0.342202	-0.314811	-0.291851	0.650082	-0.0594312	0.251227	0.379423	0.0633222	-0.00283281	-0.0996733	-0.170958	-0.0942366	-0.209685	-0.358037	0.000186378	0.158122	0.507664	0.61135	0.443395	0.26321	0.48727	0.289051	-0.368766	-0.422919	-0.26219	0.431975	0.0684841	0.268391	0.154898	0.319822	0.150322	0.0894896	0.0807077	-0.225963
2	sub11	-0.303754	-0.305792	-0.256706	-0.0829285	-0.171727	0.351571	0.266531	0.351177	0.557466	0.647152	0.462118	-0.281363	0.0180221	0.194064	0.148102	0.438412	0.606006	0.552807	0.34802	0.20096	0.14187	0.325898	-0.400017	-0.576326	-0.573687	-0.0704876	0.18363	-0.0267941	-0.0683203	0.369371	0.314132	0.186039	0.443747	-0.552069	-0.120033	0.346194	0.492051	0.567164	0.379448	0.284349	0.380432	0.535909	0.376766	0.285245
