# Supplementary figures and images for: The large-scale organization of shape processing in the ventral and dorsal pathways
Source: eLife journal article supplement (doi:10.7554/elife.27576), 2017-10-05

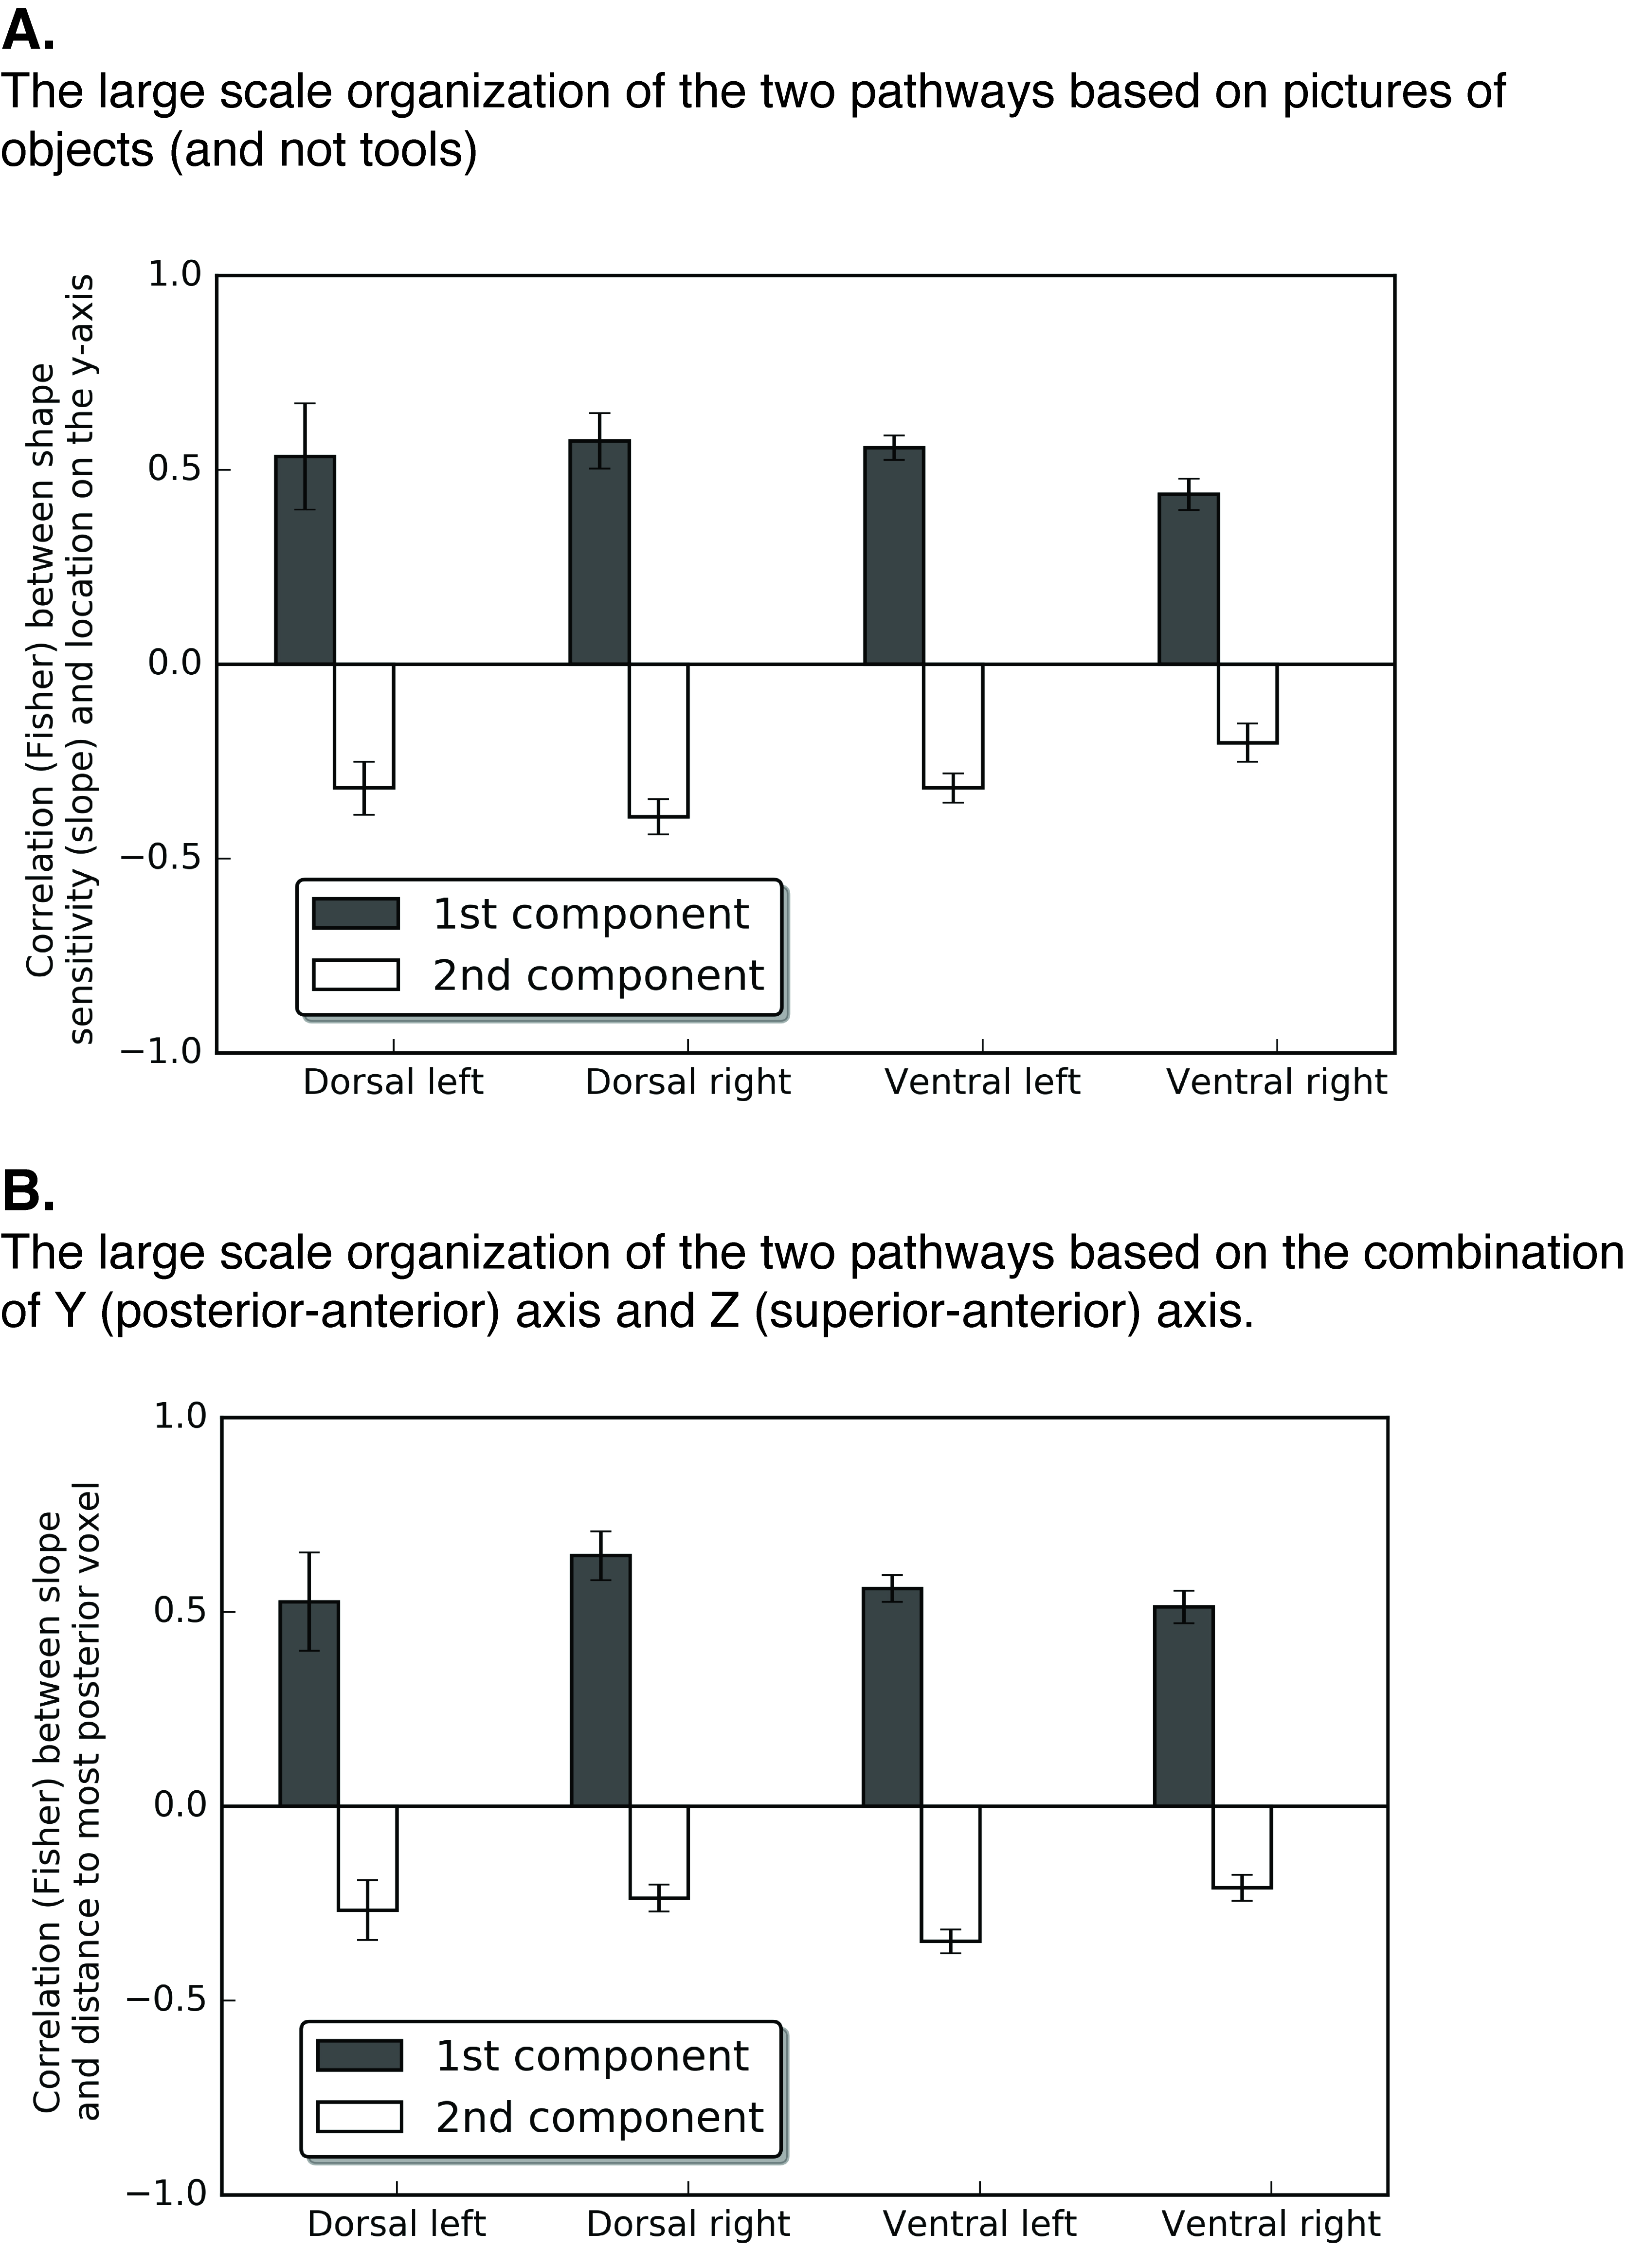

Supplement: supp [file elife-27576-supp-v1.zip › elife_poa_e27576_Figure_3_figure_supplement_1.tif]

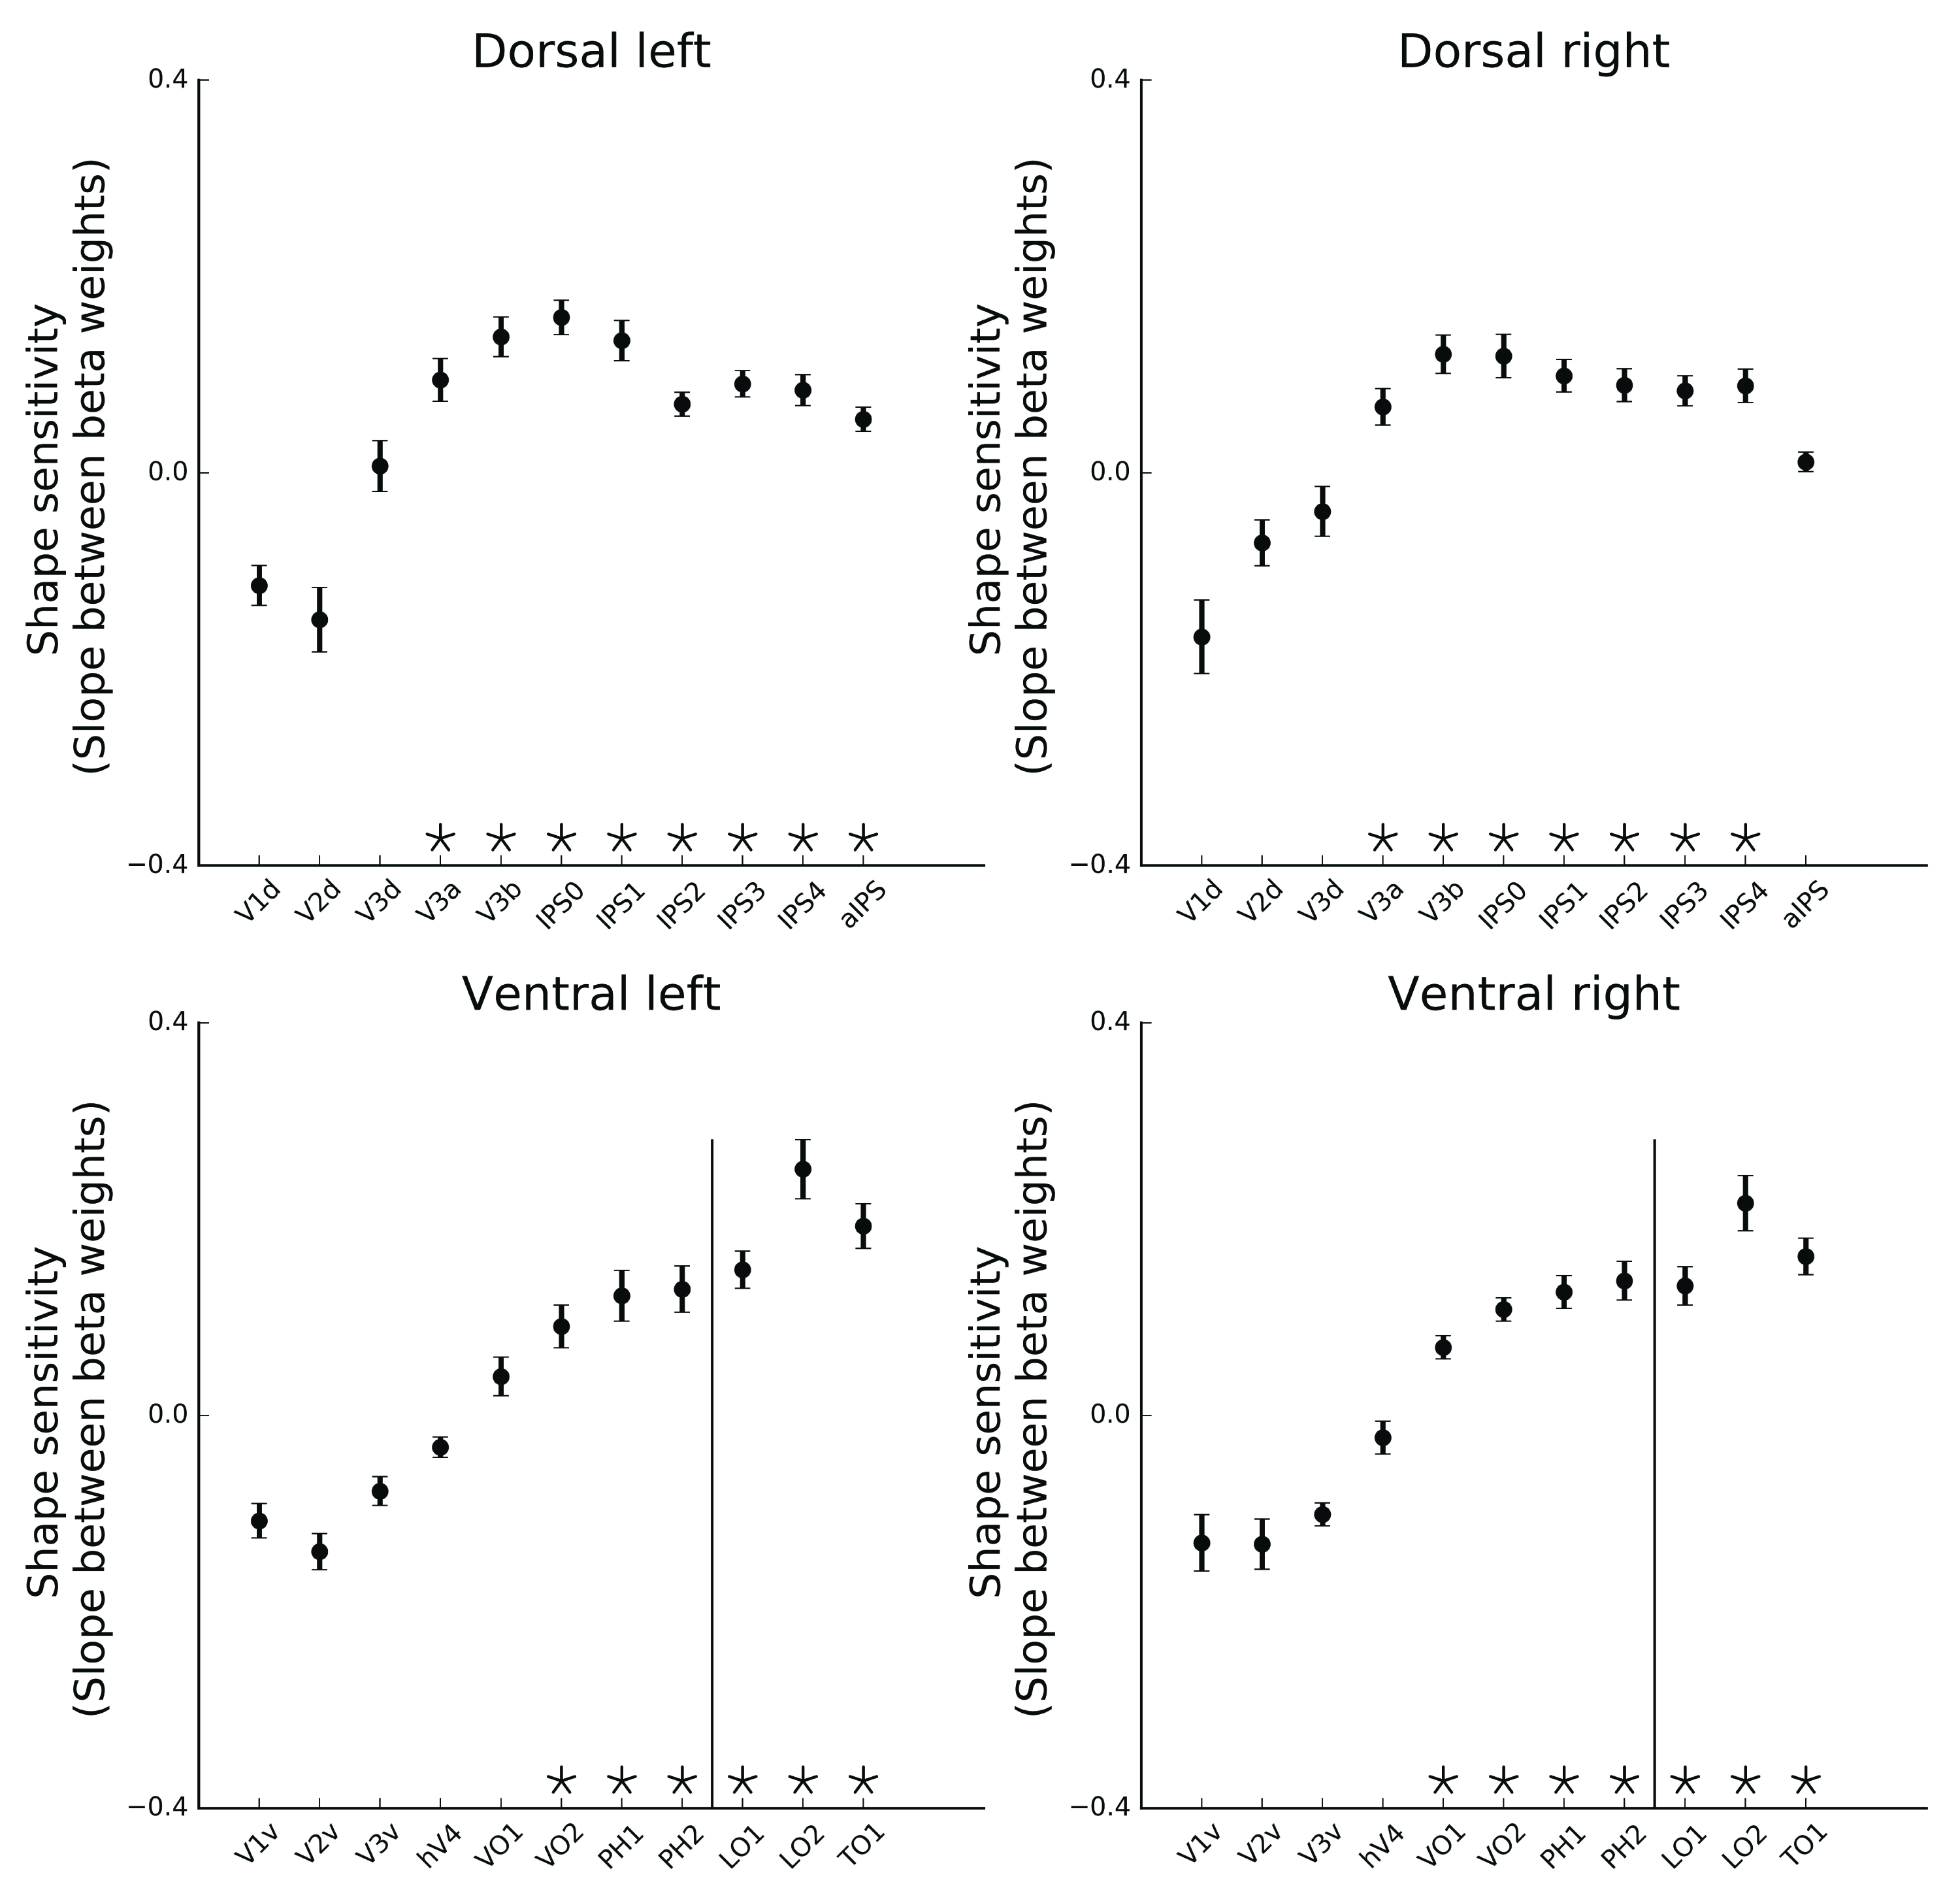

Supplement: supp [file elife-27576-supp-v1.zip › elife_poa_e27576_Figure_2_Supplement_2.tif]

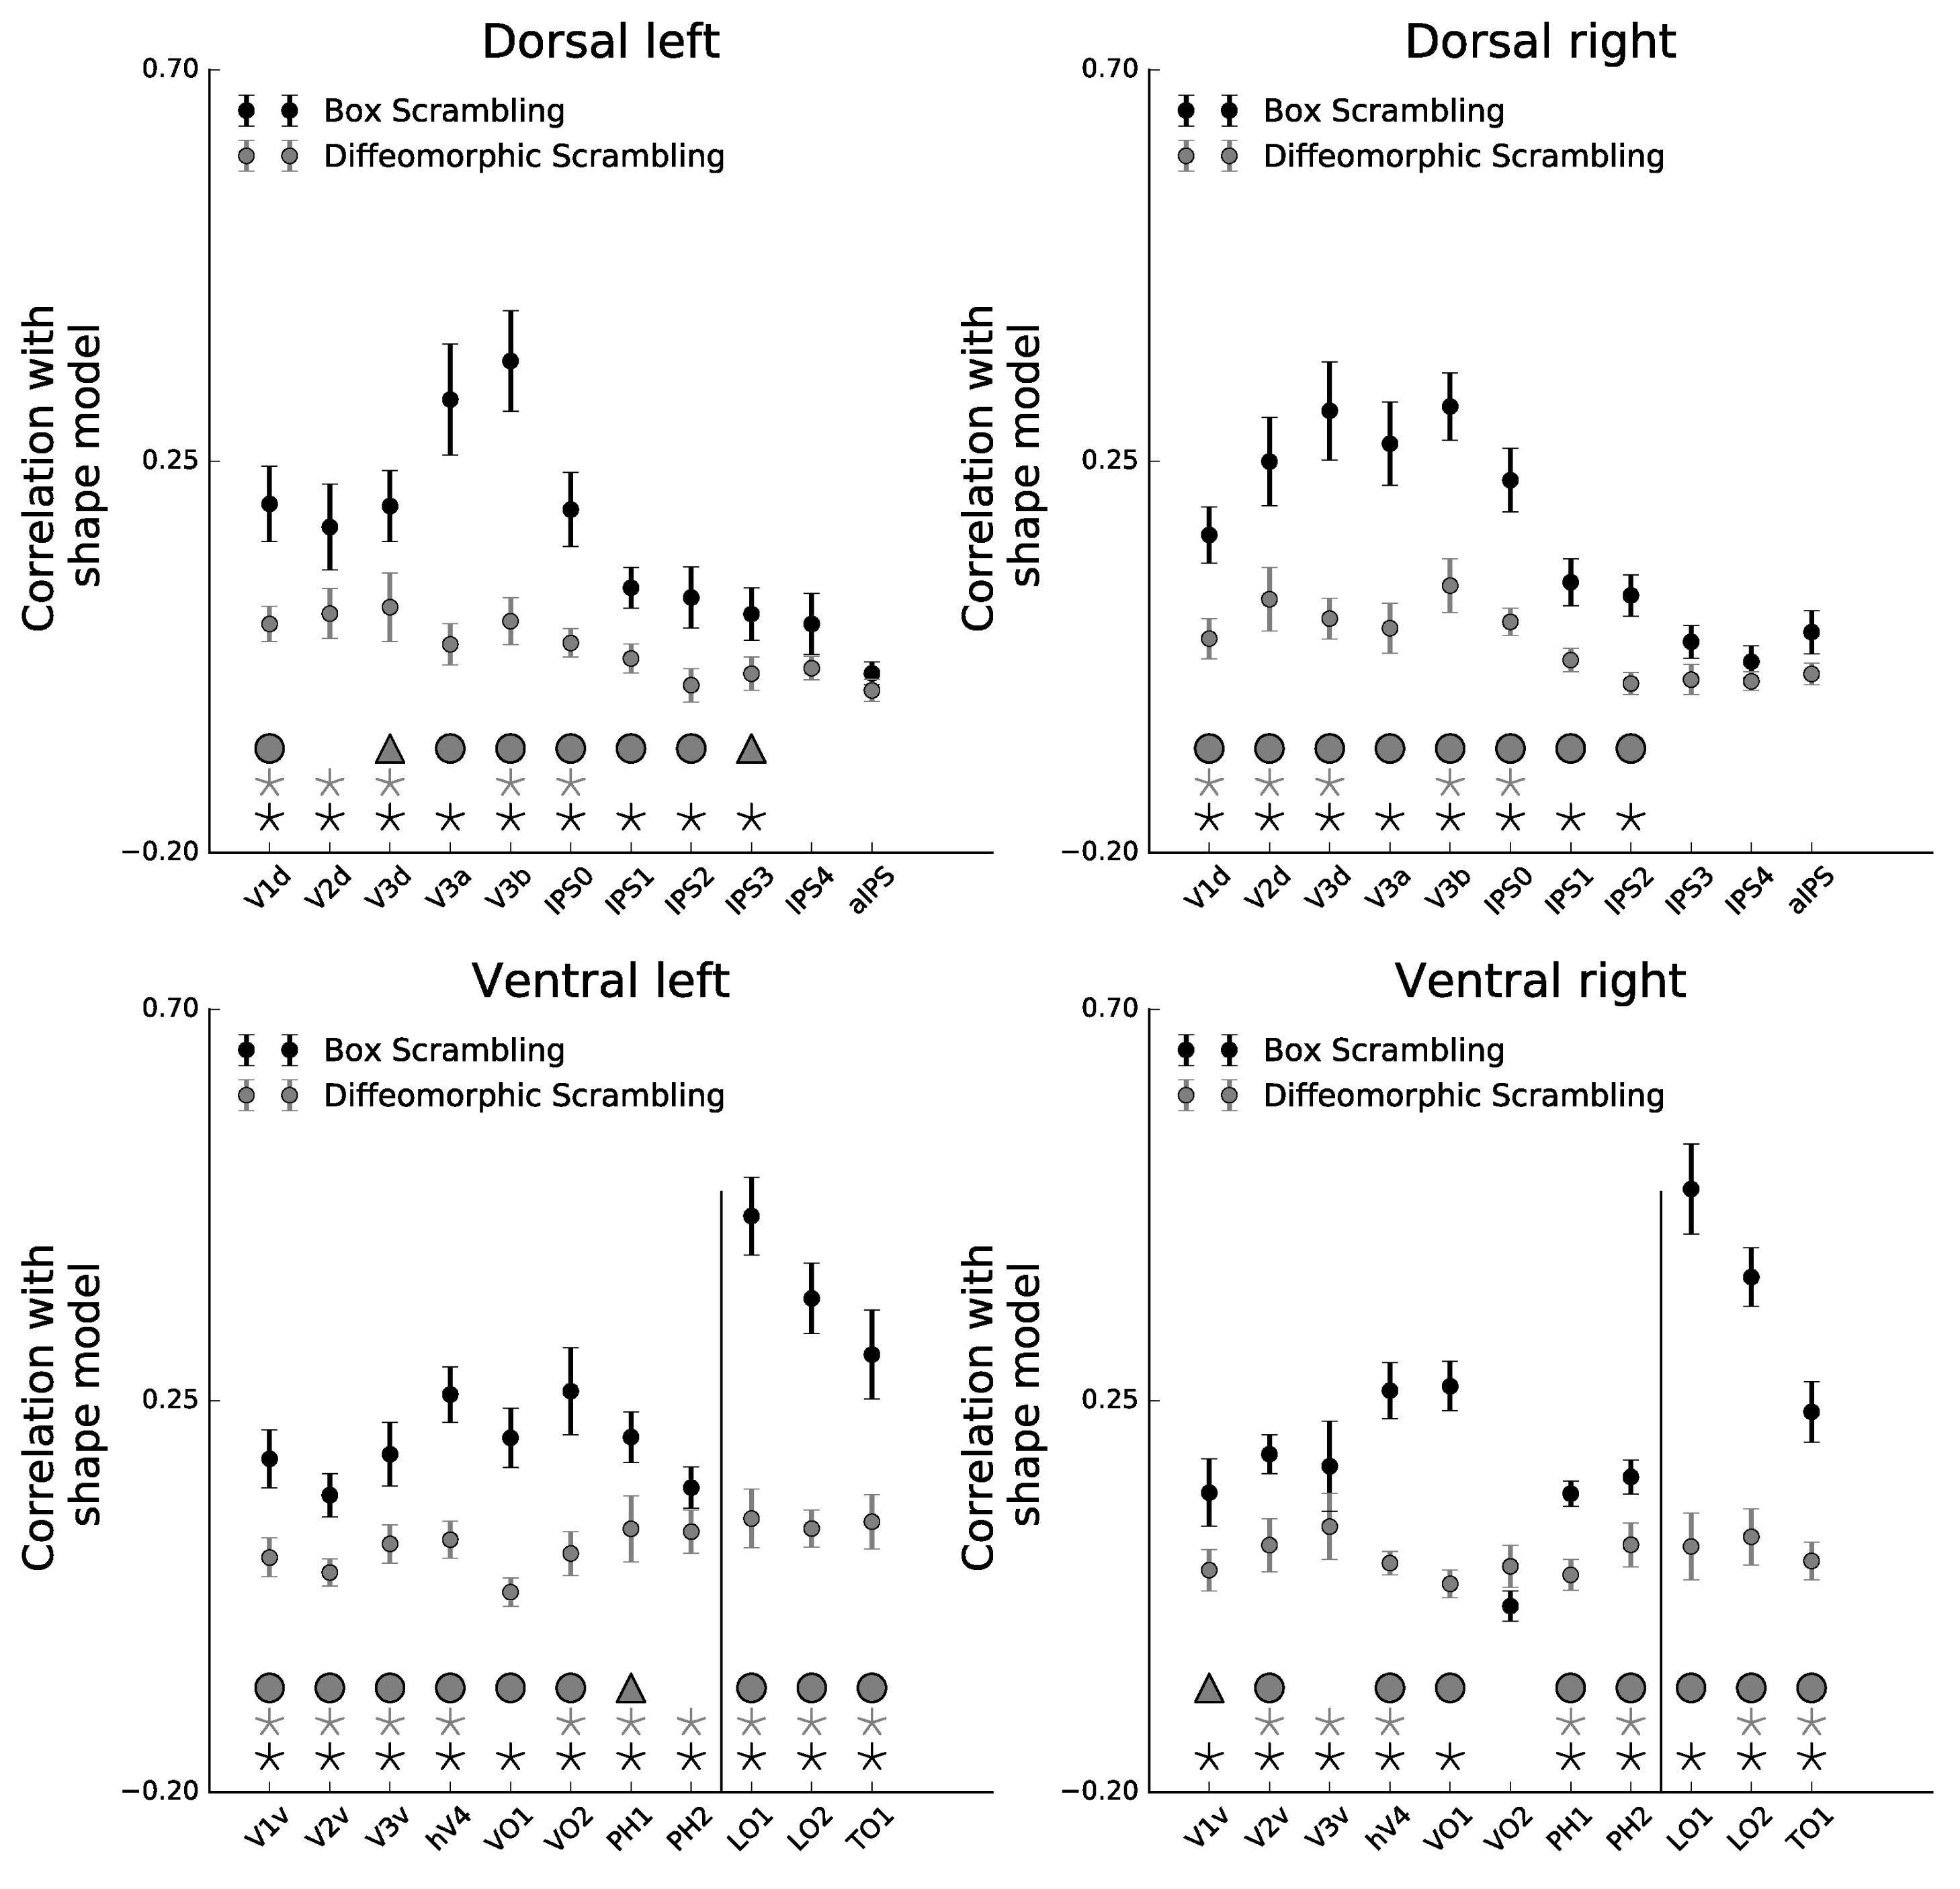

Supplement: supp [file elife-27576-supp-v1.zip › elife_poa_e27576_Figure_5_figure_supplement_1.tif]

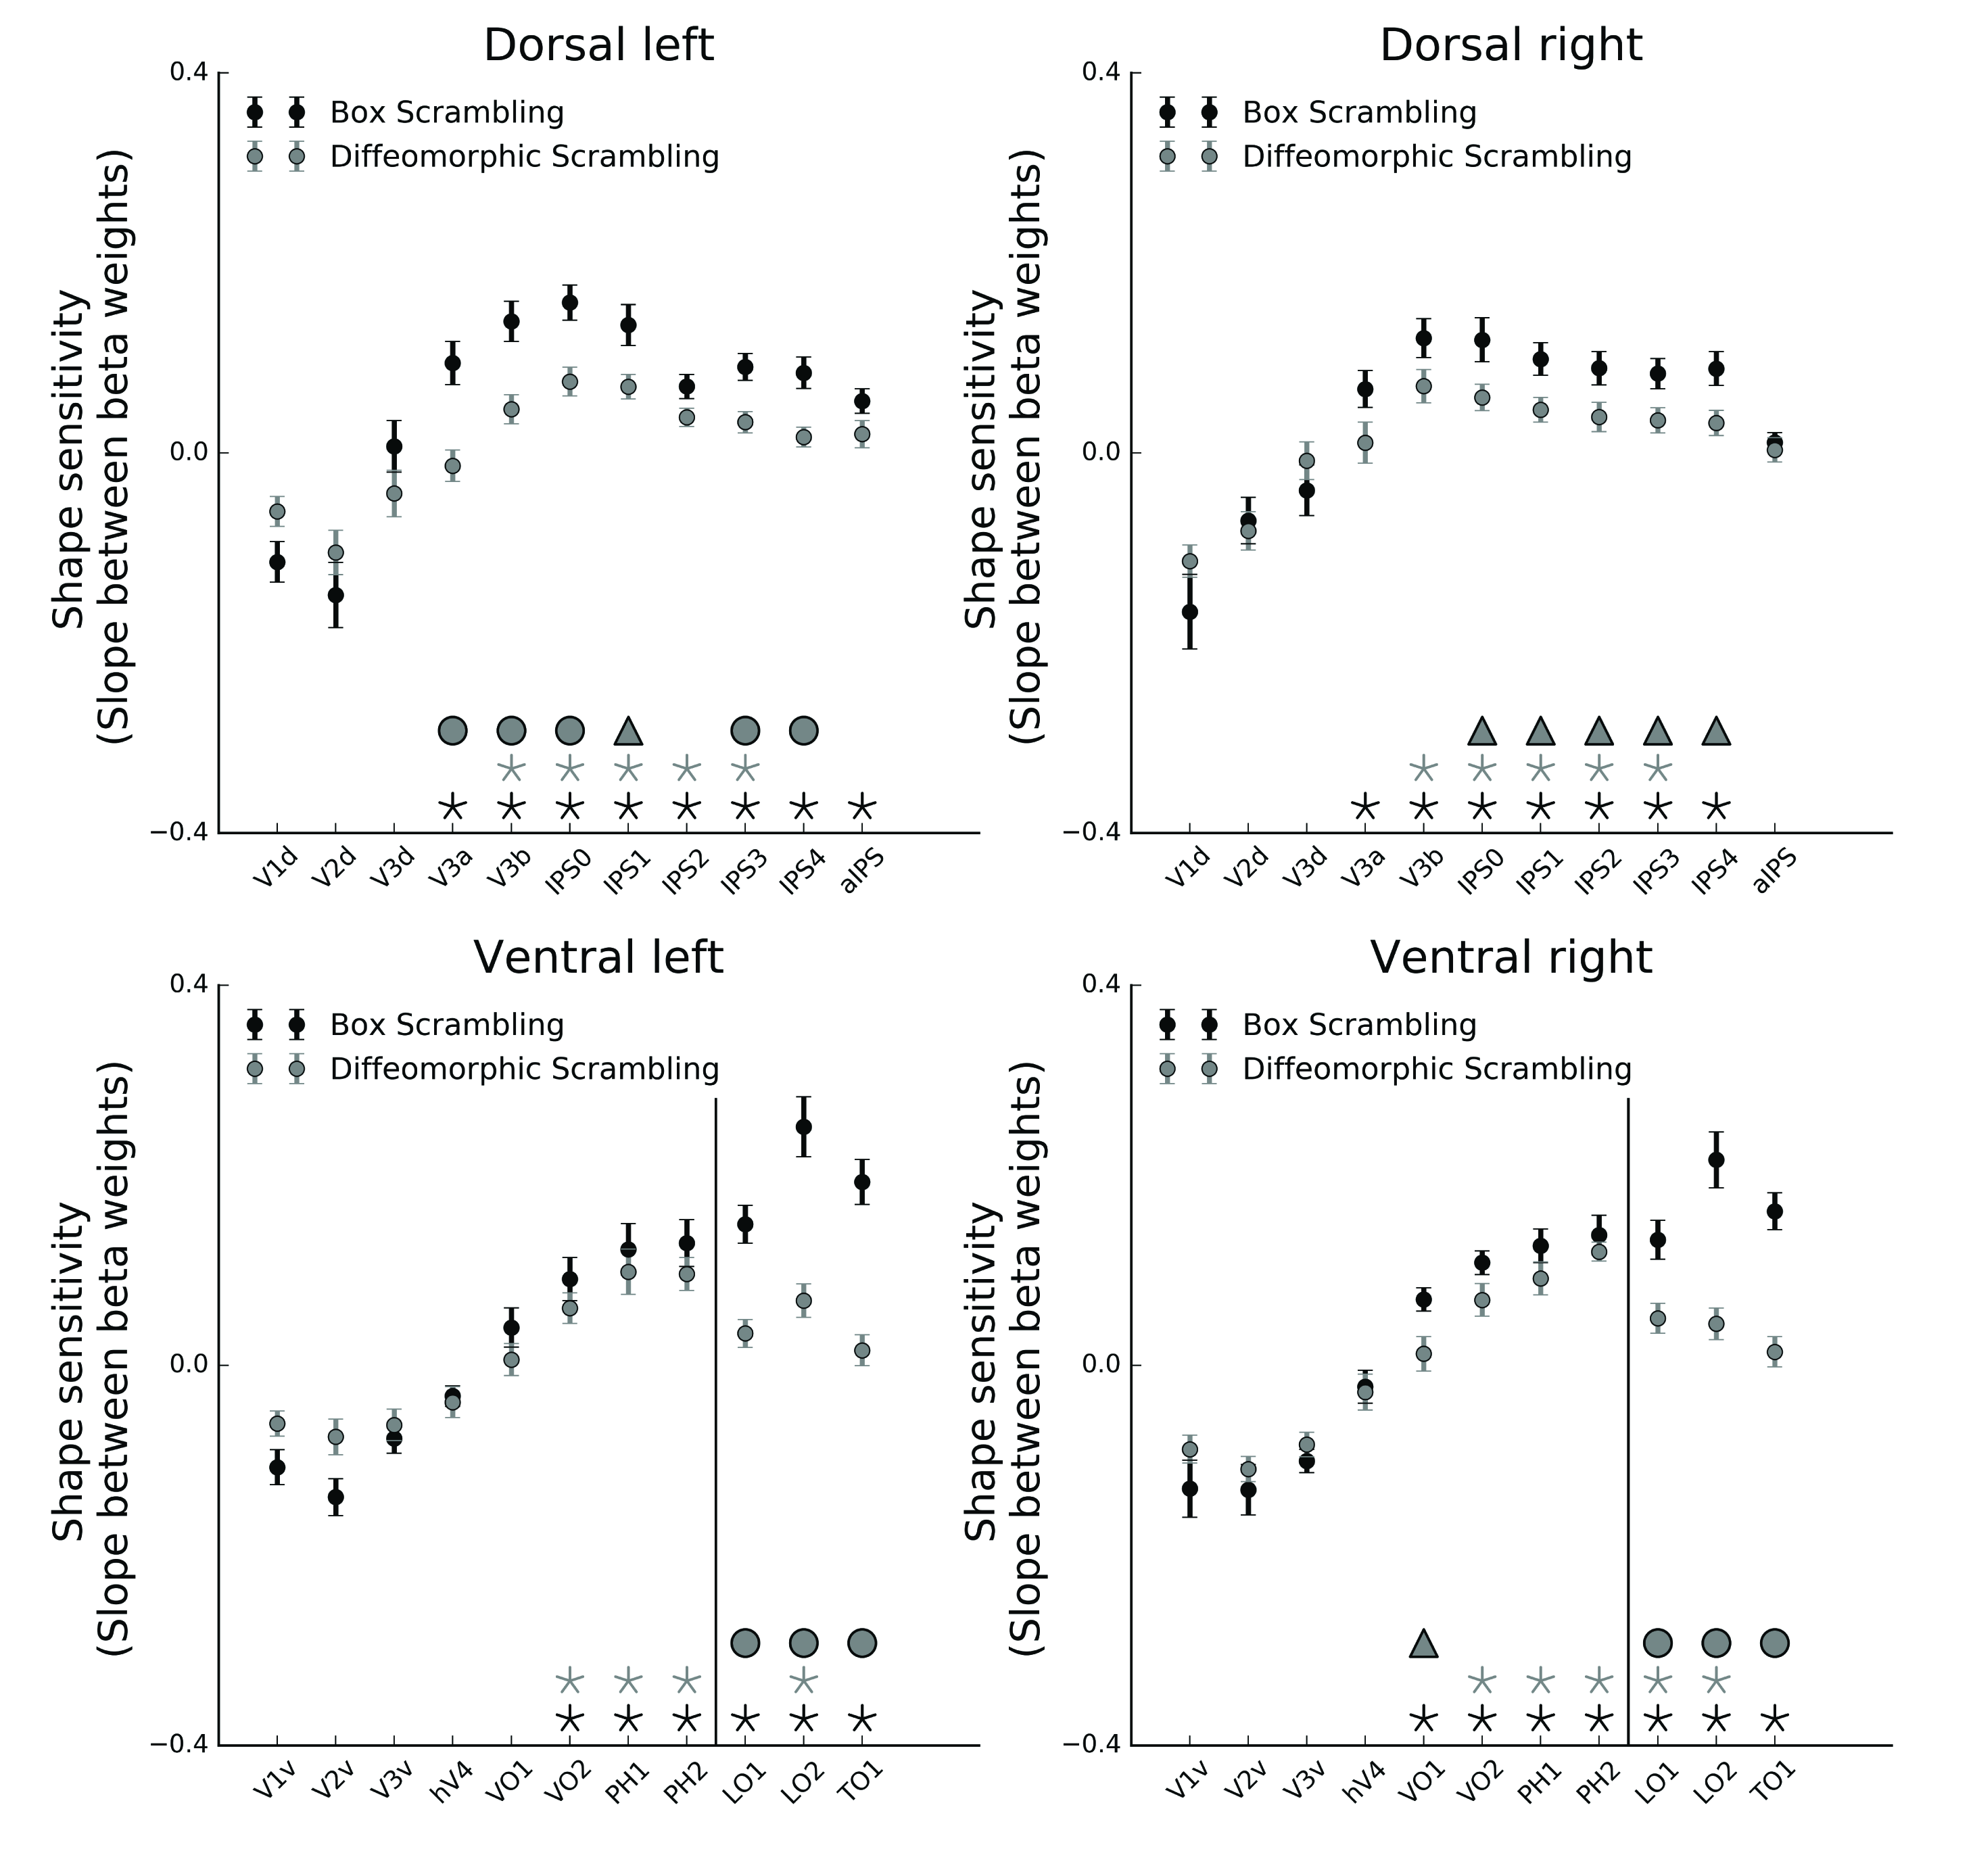

Supplement: supp [file elife-27576-supp-v1.zip › elife_poa_e27576_Figure_3_figure_supplement_2.tif]

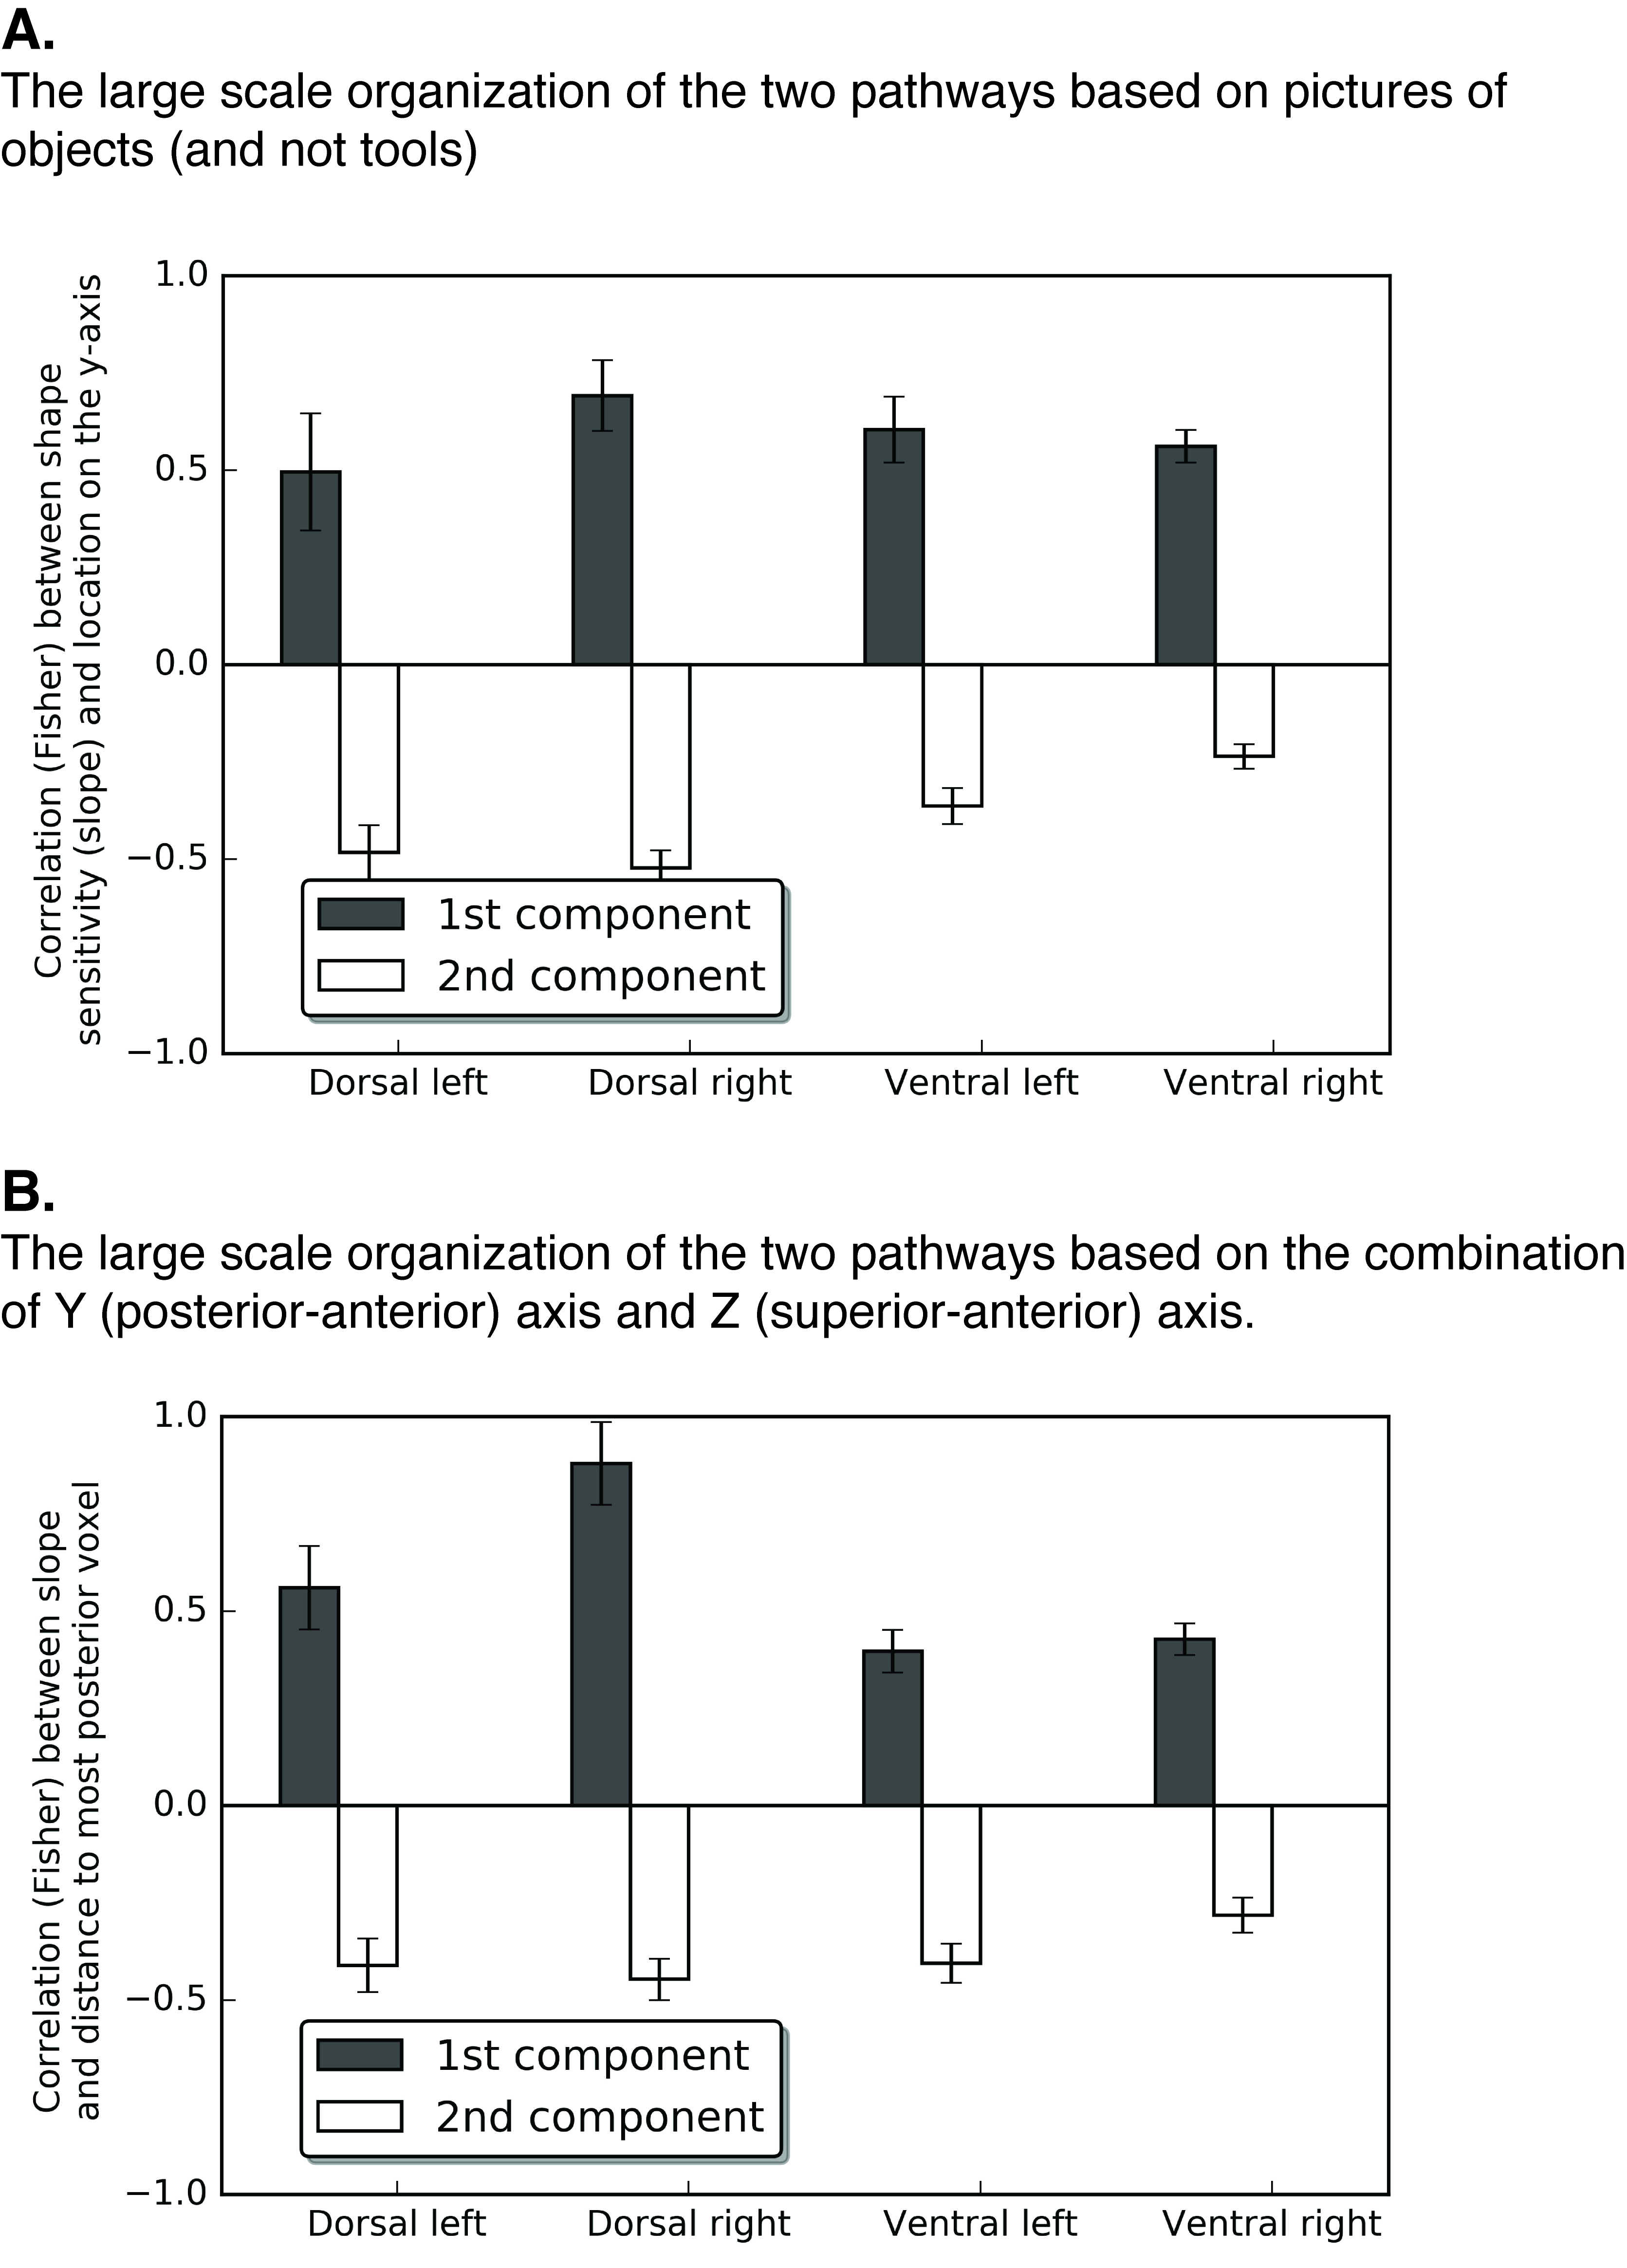

Supplement: supp [file elife-27576-supp-v1.zip › elife_poa_e27576_Figure_2_figure_supplement_1.tif]
